# Supplementary material for: Quinoa Phenotyping Methodologies: An International Consensus
Source: MDPI journal article supplement (doi:10.3390/plants10091759), 2021-08-24

## Washington State University Nutritional Phenotyping Laboratory

### Sample Organization and Tracking

Sample organization and tracking is maintained throughout the phenotyping pipeline using a system that relies on 2D digital barcodes (i.e. QR codes), barcode scanners, and USB drivers. The system is designed for quality assurance and quality control, by automating sample data entry and processing.

The first stage of this process requires generating sheets of barcode labels from seed collection packing lists provided by collaborators (Figure 1). An inventory is taken by matching QR labels with the corresponding seed packet. Each affixed label contains a QR code embedded with the sample information, along with space dedicated to human-readable text. Unique sample identifiers originating from each individual seed collection's identification scheme comprise the embedded information. The most useful information is selected and printed as human-readable text. A crucial field to include, usually embedded in the barcode, is a unique filename that can be used to query datasheets. This allows for data from each phenotyping station (NIR, subsampling, seed scanning, XRF) to be compiled.

Figure 1. Example sheet of QR code (i.e. 2D barcode) labels featuring the machine readable and human readable information. A PDF of QR code sheets is printed onto Avery 5620, or similar, labels. Credit – Evan Craine

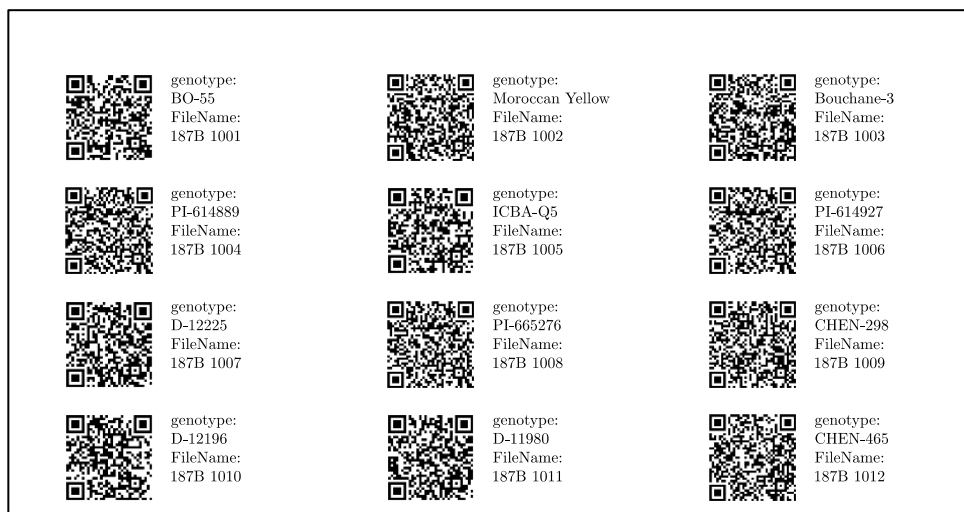

### NIR Analyzer – Data Collection

A DA7250 Near Infrared Analyzer (PerkinElmer Instruments, Springfield, Illinois, United States) is used to generate seed composition data for quinoa nutritional parameters (Figure 2). Whole, raw quinoa seed is analyzed. Should seed samples contain any impurities (stems, rocks, dirt, etc.) that could bias the spectral signature of the sample, the sample is cleaned by passing the seed through metal screens to remove bulk material, followed by the removal of fine material using a Holland 4110.23.00 seed blower. The

sample is placed in an appropriately sized sample cup, depending on total sample volume available for analysis, and leveled using a “Z” pattern to ensure consistent sample preparation between samples (Figure 3). Data is reported as an average of two repacks, to provide a more representative analysis of each sample. A repack consists of emptying the sample cup into the sample preparation tray, pouring the seed back before preparing as described above.

Figure 2. Left to right: sample preparation tray and ergonomic sample leveler; cups of various sizes to accommodate a wide range of sample volumes; TEEMI 1D & 2D USB Automatic Hands-free desktop barcode scanner; PerkenElmer (formerly Perten Instruments) DA 7250™ NIR Analyzer. Credit – Evan Craine

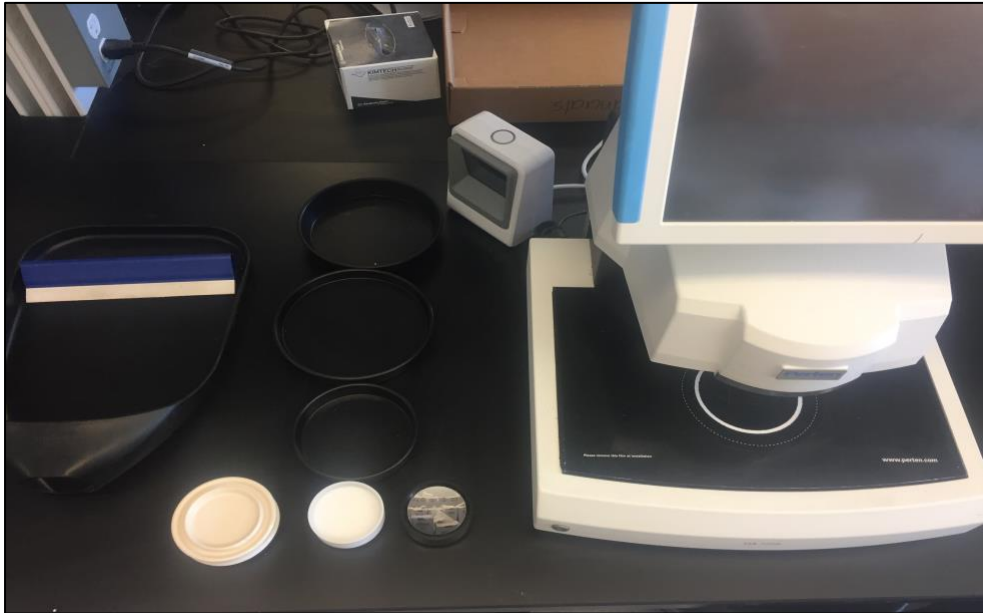

Figure 3. Small “mirror cup” used for samples of ~10g. Light is reflected off of the sample surface and collected to generate spectral data from 950-1650 nm, at 5 nm increments. Credit – Evan Craine

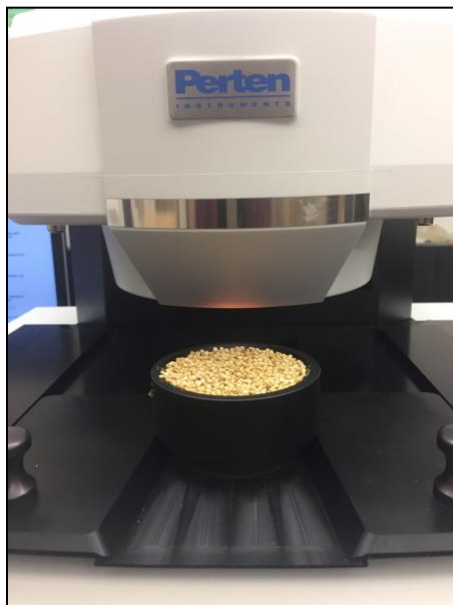

## NIR Analyzer – Calibration Development

Stock calibrations did not include amino acid calibrations for quinoa, which have since been added and improved upon. Moreover, the stock calibration was not robust, and poorly predicted novel quinoa samples; NIR analysis is best at interpolation rather than extrapolation. According to PerkinElmer (formerly Perten Instruments), the Nutritional Phenotyping Laboratory at WSU is the only group working on developing improved quinoa calibrations using the DA 7250 <sup>TM</sup>. Two improved versions of the stock calibration have been developed, with the most recent version (V3) used to generate the predicted values for the 2018 seed collections. Calibration metrics are provided in Appendix II – Table 1.

The stock calibration was developed using 27 samples provided by a group in Sweden (Figure 4 – white data points; PerkinElmer Instruments pers. comm.). The second version (V2) added samples from WSU breeding program materials and field research trials (Figure 4-colored data points). These samples were randomly selected across a normal distribution of crude protein content predicted using the stock calibration, and the Agricultural Experiment Station Chemical Laboratories ([AESCL](#)) at the University of Missouri-Columbia performed “wet chemistry” analysis of raw quinoa samples to generate reference data.

Figure 4. Example of regression data for predicted (i.e. NIR) and observed (i.e. wet chemistry) crude protein content in Quinoa Calibration (V2). Calibration metrics are presented in the top left legend of the figure. RMSECV = root mean square error of cross validation (CV); SECV = standard error of CV; RPDCV = ratio of performance to deviation CV (the ratio between the standard deviation of a variable and the standard error of prediction of that variable by a given model). Credit – Perkin Elmer

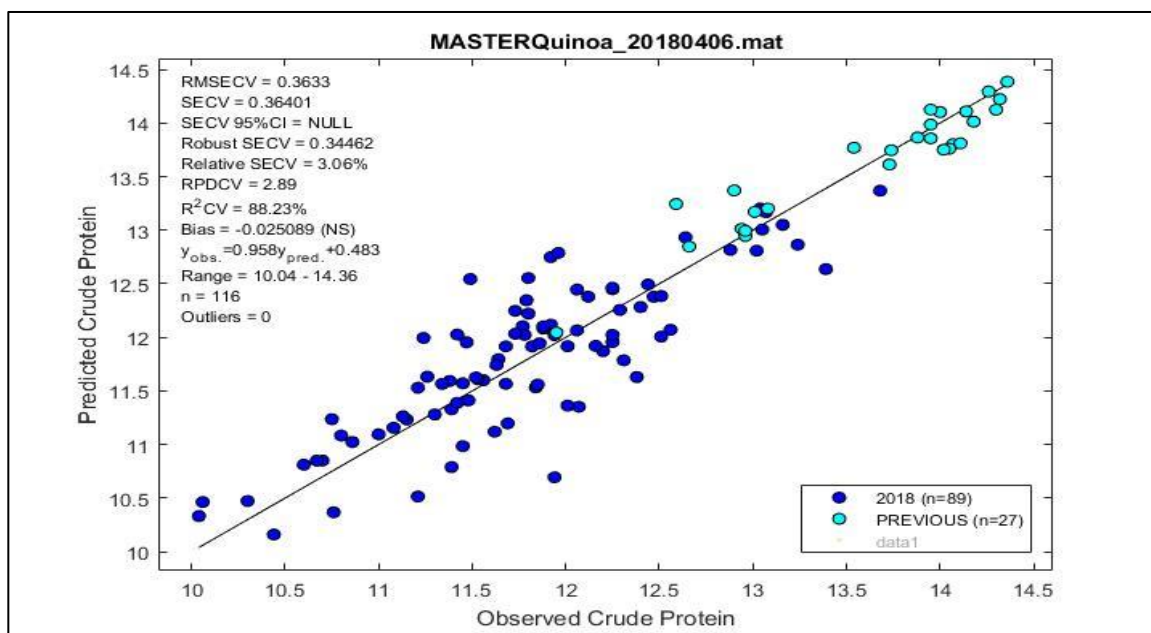

The current NIR calibration, V3, incorporated 37 samples selected from the 2018 NACRA (i.e. 18KA) seed collection. This is the only seed collection that had sufficient sample amounts for wet chemistry analysis (minimum of 25 grams). Scatter plots of predicted and observed values (i.e. reference values), in addition to calibration metrics, for each parameter are provided in Appendix III. These data are provided by David Honigs, who also developed V3 of the NIR calibration (PerkinElmer).

PerkinElmer conducted sample selection using the Kennard-Stone Method on spectral data. Reference data was again generated by the AESCL; however, 10 blind duplicates were included to measure and account for laboratory standard error in the calibration. Following calibration development, PerkinElmer performed 8 fold cross validation in triplicate to measure calibration prediction accuracy metrics, which are reported as an average measure. These data, referred to as calibration metrics, are presented in Appendix II and III. Perten Instruments repredicted all the NIR data for the 2018 seed collections using V3 of the calibration. Mahalanobis distance (MD) and nearest neighbor distance (NND) were calculated for each parameter. Outliers can be identified using the MD values from the reference samples and represent samples that are outside the reference data range or poorly fit the model. Parameters are reported on an as is basis (gram 100g<sup>-1</sup> sample), unless otherwise noted. Crude protein content is calculated as percent nitrogen multiplied by 6.25 ([LECO](#)). It is worth noting that prediction of hydroxylysine and hydroxyproline is extremely limited by the finite reference data range, and this is also true to some extent for tryptophan. Lanthionine and orthinine are not included in the calibration because of a lack of useful reference data (i.e. values reported as 0.00).

### **Seed Scanning System – Data Collection**

The Nutritional Phenotyping Laboratory removes a small subsample (approximately 1-2 grams) of each sample for seed scanning. The weight of each subsample is measured using an Ohaus Scout SPX123 Analytical Balance (Parsippany, New Jersey, United States), with a capacity of 120 grams and measurement to 0.001 grams. A barcode scanner is used to populate the sample information into an Excel spreadsheet, and USB driver is used to facilitate transfer of the balance output directly to the spreadsheet. Seed scanning is carried out using flatbed scanners (Epson Perfection V39; 1200 dpi), and provides several useful measurements of the seed phenotype. For example, seed size, seed color, and seed shape can be quantified. The number of seeds in each subsample is automatically counted, and this information is combined with the weight of the subsample to calculate the 1000 seed weight. Using data from the 2018 Germany seed collection, hand-counted 1000 seed weight was compared to scanner-counted 1,000 seed weight. The two methods have a significant, strong positive correlation ( $R = 0.95$ ,  $p < 2.2\text{e-}16$ ) (Figure 6). The “Arabidopsis Seed Method” in the “Phytomorph Image Phenomics Tool Kit” is used for image analysis (Figure 5 (A)). However, this method has been replaced by a new algorithm incorporating a blue background (Figure 5 (B)). This work is performed in collaboration with Nathan Miller at the University of Wisconsin-Madison and Yang Hu at Washington State University. Nathan Miller developed the image analysis software, and Yang Hu adapted the Python shell scripts shared by UW-

Madison to support simultaneous operation of up to 8 flatbed scanners and automated hierarchical file storage based on QR code information

Figure 5. (A) Oro de Valle seed scan mask image using the Arabidopsis Seed Method. Green colored seeds are touching and identified as a larger object relative to the smaller objects (i.e. individual seeds colored red). Larger objects are divided by the average smaller object size to determine the number of smaller objects present in the larger objects, and their characteristics. (B) Scan image of Titicaca seed (2019 Australia seed collection) using blue background. Image resolution reduced from 1200 DPI to 250 DPI. Objects, such as fine debris, that are smaller than the seed objects are filtered out and excluded from the image analysis. Image Credit – Nathan Miller

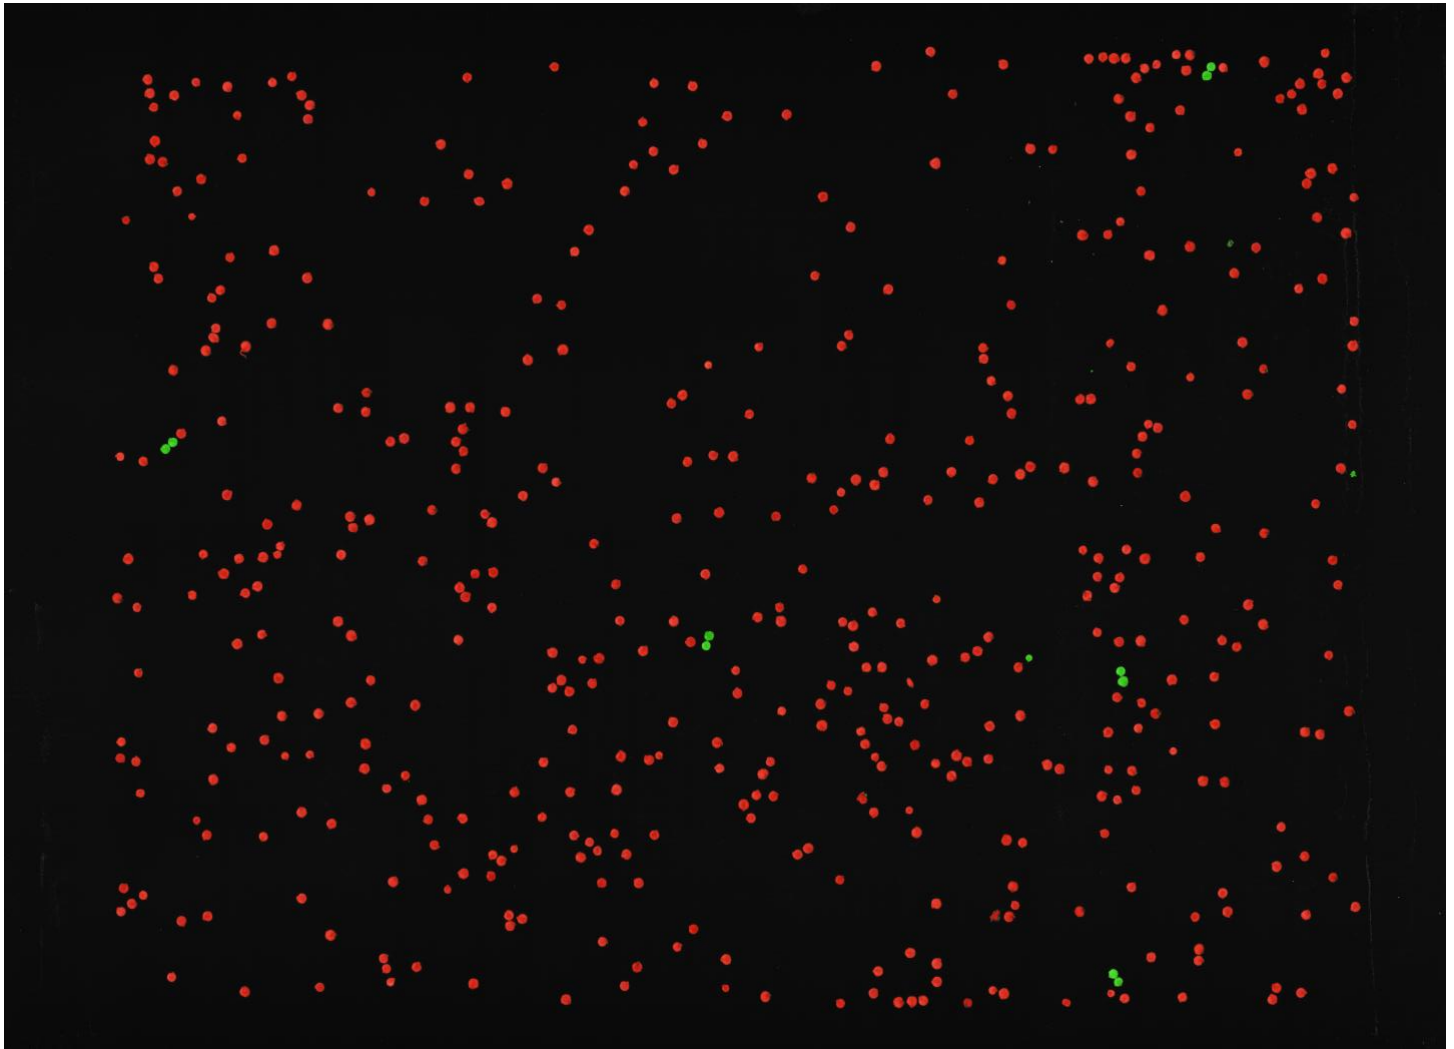

(A)

(B)

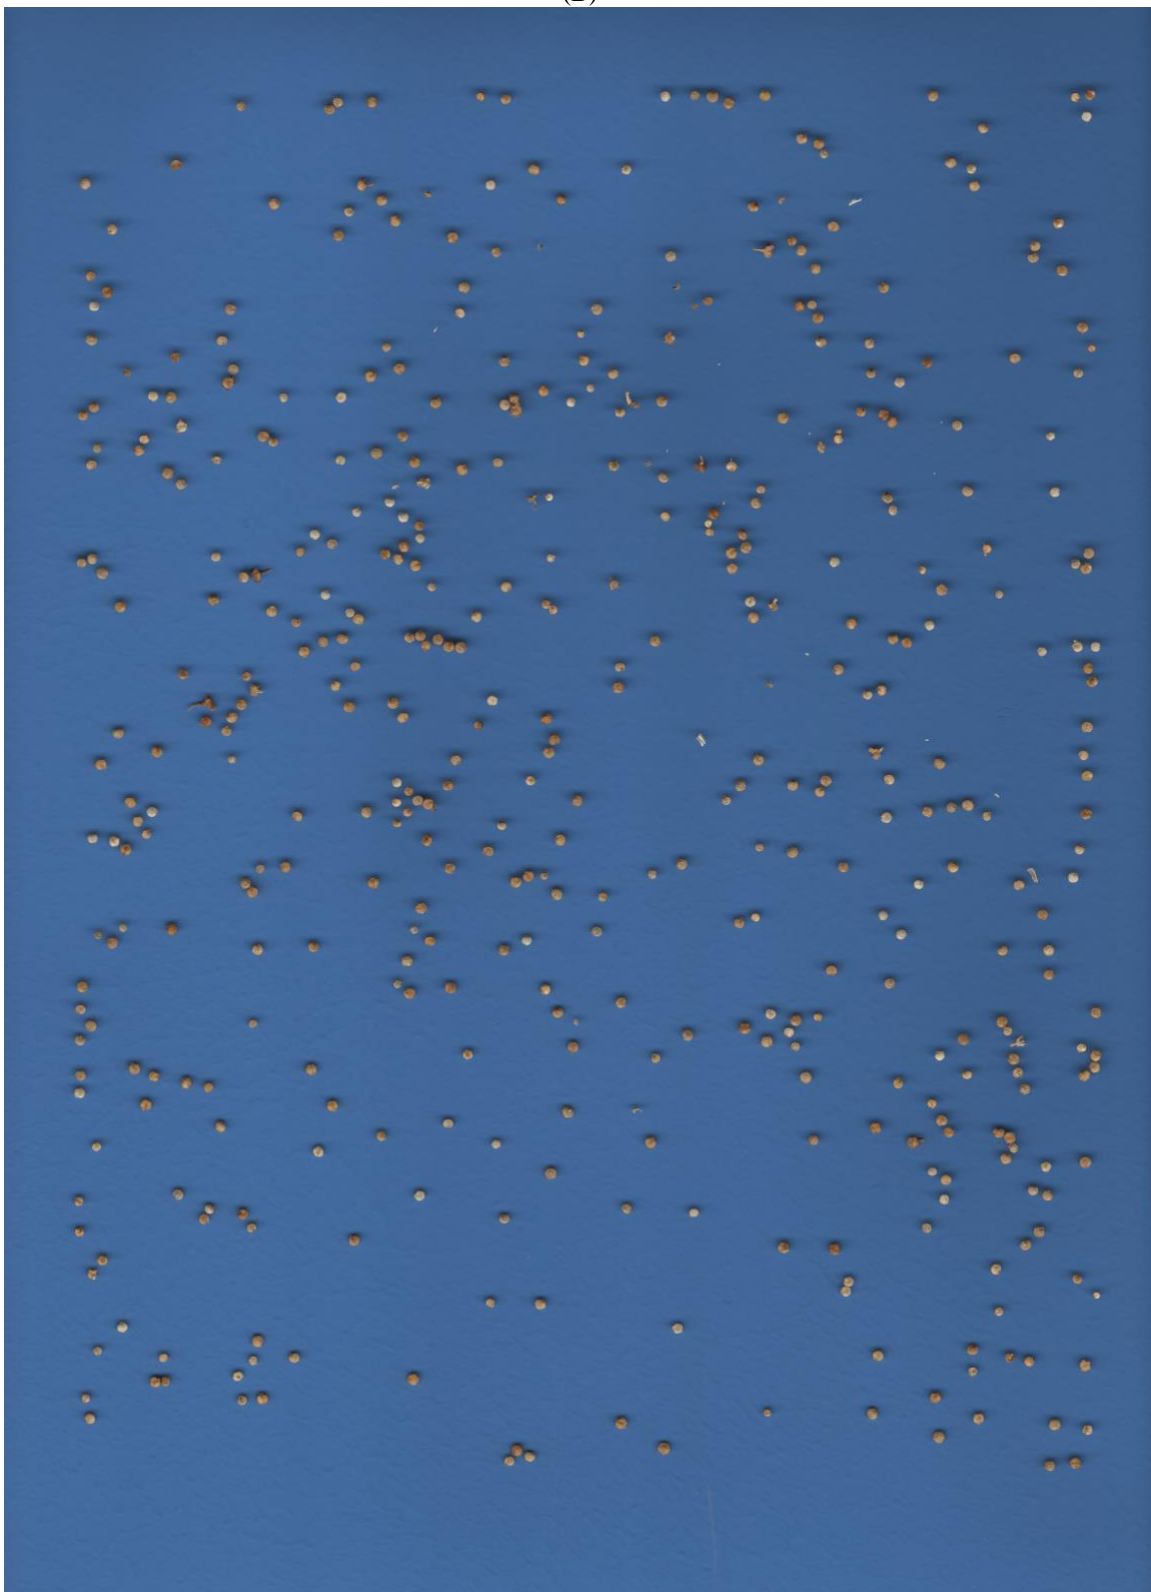



Figure 6. Hand-counted 1000 seed weight (x-axis; 2018 (manual)) compared to scanner-counted 1,000 seed weight (y-axis; 2018 (evan)) for samples from the 2018 Germany seed collection. Image Credit – Dilan Sarange

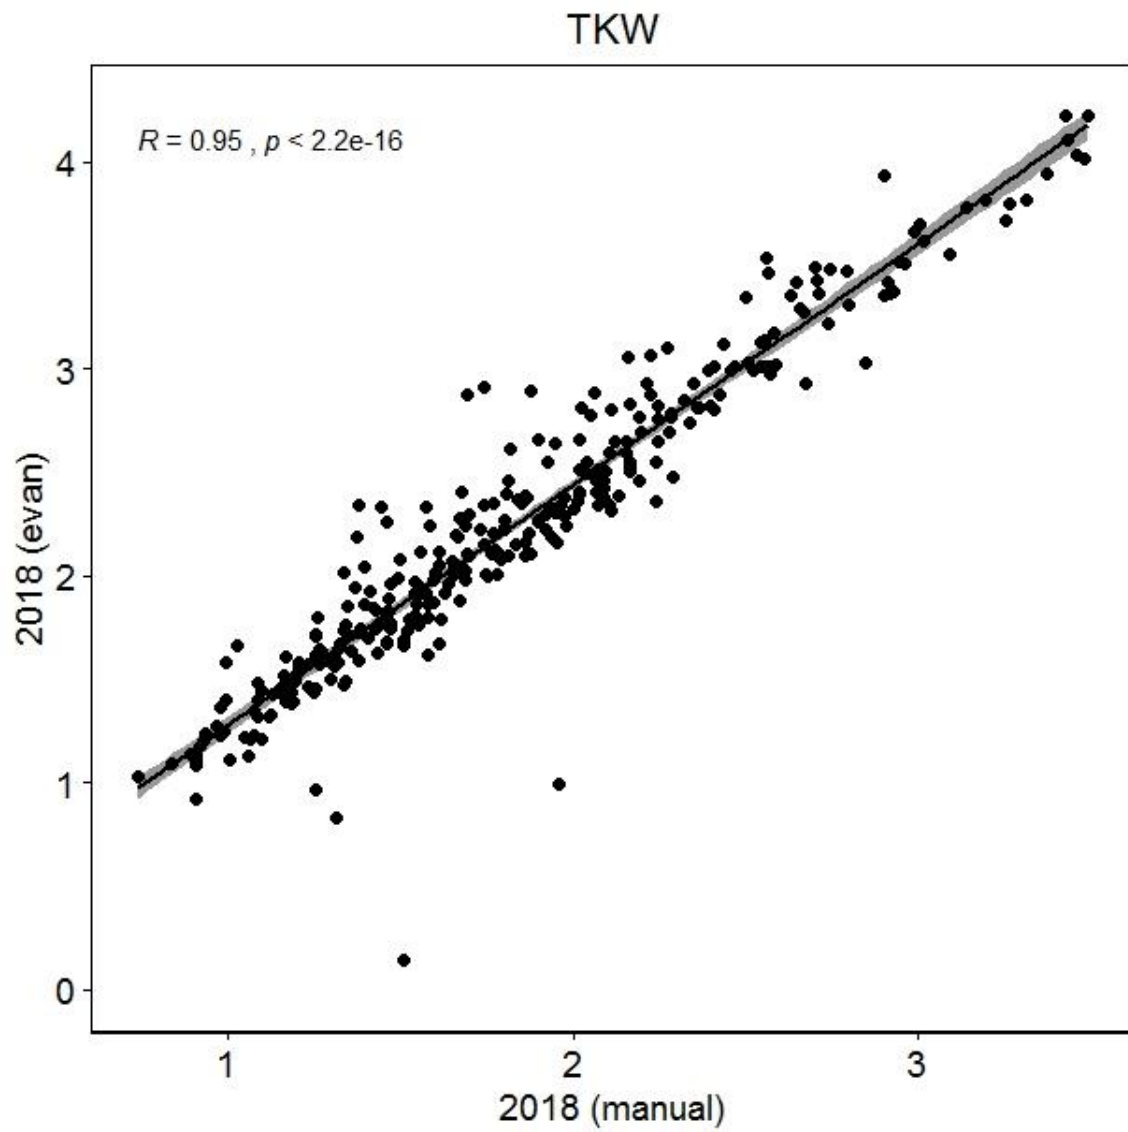

## Seed Scanning System – Metadata for Scan Output File

The “Arabidopsis Seed Method” in the “Phytomorph Image Phenomics Tool Kit” generates numerous parameters useful for characterizing seed phenotypes, and understanding various within and among seeds in a sample. These parameters are listed below. A “default\_” prefixes denotes a parameter automatically generated through the analysis, while an “adj\_” prefix represents a unit conversion from the “default\_” parameter (e.g. dpi to mm).

### **default\_AverageArea**

Average area calculated as a mean of all seed areas

### **adj\_AverageArea\_mm2**

The average area of all seeds, adjusted to mm<sup>2</sup>

### **default\_StdArea**

Standard deviation of the average area

### **adj\_StdArea\_mm2**

Standard deviation of the average area, adjusted to mm<sup>2</sup>

### **default\_MajorAxisLength**

Length of the major axis, calculated as a mean of all seed major axis lengths

### **adj\_MajorAxisLength\_mm**

Average major axis length, adjusted to mm

### **default\_StdMajorAxisLength**

Standard deviation of the average major axis length

### **adj\_StdMajorAxisLength\_mm**

Standard deviation of the average major axis length, adjusted to mm

### **default\_MinorAxisLength**

Length of the minor axis, calculated as a mean of all seed minor axis lengths

### **adj\_MinorAxisLength\_mm**

Average minor axis length, adjusted to mm

### **default\_StdMinorAxisLength**

Standard deviation of the average minor axis length

### **adj\_StdMinorAxisLength\_mm**

Standard deviation of the average minor axis length, adjusted to mm

### **default\_AverageEccentricity**

Average eccentricity calculated as a mean of all seed eccentricities. A circle has an

eccentricity of 0. Calculated as  $\sqrt{1 - \frac{b^2}{a^2}}$  where  $a$  = length of the semi-major axis (half of the major axis) and  $b$  = length of the semi-minor axis (half of the minor axis).

### **default\_StdEccentricity**

Standard deviation of the average eccentricity

*\*For the following, the second operation is listed first, followed by the first operation\**



**default\_AverageMeanRed**

*Average of the mean red pixels*

Mean of the seed red pixels for each seed, then average of the red pixel means for all seeds

**default\_StdMeanRed**

*Standard deviation of the red pixel means*

Mean of the seed red pixels for each seed, then standard deviation of the red pixel means for all seeds

**default\_AverageMeanGreen**

*Average of the mean green pixels*

Mean of the seed green pixels for each seed, then average of the green pixel means for all seeds

**default\_StdMeanGreen**

*Standard deviation of the green pixel means*

Mean of the seed green pixels for each seed, then standard deviation of the green pixel means for all seeds

**default\_AverageMeanBlue**

*Average of the mean blue pixels*

Mean of the seed blue pixels for each seed, then average of the blue pixel means for all seeds

**default\_StdMeanBlue**

*Standard deviation of the blue pixel means*

Mean of the seed blue pixels for each seed, then standard deviation of the blue pixel means for all seeds

**default\_AverageStdRed**

*Average of the standard deviations*

Standard deviation of the red pixels for each seed, then average of the red pixel standard deviations

**default\_StdStdRed**

*Standard deviation of the standard deviations*

Standard deviation of the red pixels for each seed, then standard deviation of the red pixel standard deviations

**default\_AverageStdGreen**

*Average of the standard deviations*

Standard deviation of the green pixels for each seed, then average of the green pixel standard deviations

**default\_StdStdGreen**

*Standard deviation of the standard deviations*

Standard deviation of the green pixels for each seed, then standard deviation of the green pixel standard deviations

**default\_AverageStdBlue**

*Average of the standard deviations*

Standard deviation of the blue pixels for each seed, then average of the blue pixel standard deviations

**default\_StdStdBlue**

*Standard deviation of the standard deviations*

Standard deviation of the blue pixels for each seed, then standard deviation of the blue pixel standard deviations

**default\_totalCount**

Total number of seeds counted in the scanned image

**color**

AverageMeanRed, AverageMeanGreen, and AverageMeanBlue values used to shade Excel cell using the Excel module script in Appendix I with Visual Basic Editor

**SS\_g**

Subsample weight in grams for the seeds in the scanned image, measured before the seeds are placed on the scanner

**1Kseedweight**

Calculated as  $(SS\_g/default\_totalCount) * 1000$ . See “18KA\_1000SeedWeight” Excel Workbook for predicted 1Kseedweight using seed scanning system to hand counted 1Kseedweight.

**Appendix I** - Color function to add as macro in Excel to fill cell with color, based on red (R\_, green (G) and blue (B) values

Function myRGB(r, g, b)

```
Dim clr As Long, src As Range, sht As String, f, v
```

```
If IsEmpty(r) Or IsEmpty(g) Or IsEmpty(b) Then
```

```
    clr = vbWhite
```

```
Else
```

```
    clr = RGB(r, g, b)
```

```
End If
```

```
Set src = Application.ThisCell
```

```
sht = src.Parent.Name
```

```
f = "Changeit(""" & sht & """, """" & _
```

```
    src.Address(False, False) & """, " & clr & ")"
```

```
src.Parent.Evaluate f
```

```
myRGB = ""
```

```
End Function
```

```
Sub ChangeIt(sht, c, clr As Long)
```

```
    ThisWorkbook.Sheets(sht).Range(c).Interior.Color = clr
```

```
End Sub
```

## **Appendix II – NIR Calibration Metrics and Comparison**

**Table 1.** Calibration metrics presented for V2 and V3 (current) of the whole, raw (unprocessed) quinoa seed analysis profile. The range of values for the reference samples are provided and compared to the values reported by Escuredo et al. (2014) (STATS FROM NIR PAPER). Parameters with a range less than the value reported by Escuredo et al. (2014) have the potential to be improved by incorporating samples into the calibration that increase the range of reference values. This is summarized on the right side of the table, with particular parameters presented in bold text if the V3 range is less than the range reported by Escuredo et al. (2014). Amino acids are reported as g/100g protein. Hydroxylysine and hydroxyproline are poorly predicted. Crude protein, ash, crude fat, moisture and total amino acids (TotalAA) are reported as g/100g sample.

| Parameter     | STATS FROM NIR PAPER (g 100g-1 protein) |       |       |       |       |       | STATS FROM WSU CALIBRATION V2 DATA (g 100g-1 protein) |       |       |      |       |         | STATS FROM WSU CALIBRATION V3 DATA (g 100g-1 protein) |             |       |       |            |                | Range>Paper? | Parameter     |
|---------------|-----------------------------------------|-------|-------|-------|-------|-------|-------------------------------------------------------|-------|-------|------|-------|---------|-------------------------------------------------------|-------------|-------|-------|------------|----------------|--------------|---------------|
|               | Min                                     | Max   | Range | SECv  | RZCV  | Min   | Max                                                   | Range | Range | Min  | Max   | RMSSECv | SECv                                                  | Robust SECv | RPDcv | RZCV  | MD warning | MD error limit |              |               |
| Alanine       | 1.26                                    | 3.1   | 1.84  | 0.024 | 0.437 | 3.84  | 4.88                                                  | 1.04  | 1.99  | 2.89 | 4.88  | 0.022   | 0.022                                                 | 0.018       | 3.036 | 0.892 | 6.657      | 8.173          | YES          | Alanine       |
| Arginine      | 1.32                                    | 5.69  | 4.37  | 0.04  | 0.735 | 6.35  | 8.39                                                  | 2.04  | 4.68  | 4.58 | 9.25  | 0.053   | 0.053                                                 | 0.044       | 4.308 | 0.946 | 6.565      | 8.722          | YES          | Arginine      |
| Aspartic acid | 1.49                                    | 7.32  | 5.83  | 0.04  | 0.616 | 7.13  | 8.73                                                  | 1.6   | 3.22  | 5.51 | 8.73  | 0.039   | 0.040                                                 | 0.036       | 3.768 | 0.930 | 6.754      | 8.528          | no           | Aspartic acid |
| Cysteine      | 0.05                                    | 0.33  | 0.28  | 0.012 | 0.426 | 1.56  | 2.07                                                  | 0.51  | 0.76  | 1.31 | 2.07  | 0.010   | 0.010                                                 | 0.010       | 3.188 | 0.902 | 6.436      | 8.359          | YES          | Cysteine      |
| Glutamic acid | 4.32                                    | 13.26 | 8.94  | 0.084 | 0.584 | 10.86 | 14.98                                                 | 4.12  | 7.04  | 8.22 | 15.26 | 0.093   | 0.093                                                 | 0.086       | 3.802 | 0.931 | 6.373      | 8.239          | no           | Glutamic acid |
| Glycine       | 2.03                                    | 4.22  | 2.19  | 0.028 | 0.48  | 5.07  | 6.11                                                  | 1.04  | 1.33  | 4.78 | 6.11  | 0.041   | 0.041                                                 | 0.036       | 2.447 | 0.834 | 3.691      | 5.408          | no           | Glycine       |
| Histidine     | 0.63                                    | 3.08  | 2.45  | 0.015 | 0.67  | 2.29  | 2.91                                                  | 0.62  | 1.05  | 1.96 | 3.01  | 0.015   | 0.015                                                 | 0.014       | 4.564 | 0.952 | 6.314      | 7.869          | no           | Histidine     |
| Isoleucine    | 0.25                                    | 1.43  | 1.18  | 0.02  | 0.652 | 3.55  | 4.41                                                  | 0.86  | 1.51  | 2.89 | 4.41  | 0.021   | 0.022                                                 | 0.019       | 3.392 | 0.913 | 6.586      | 8.557          | YES          | Isoleucine    |
| Leucine       | 0.36                                    | 3.51  | 3.15  | 0.033 | 0.579 | 5.63  | 6.85                                                  | 1.22  | 2.55  | 4.3  | 6.85  | 0.031   | 0.032                                                 | 0.029       | 3.473 | 0.917 | 6.361      | 8.657          | no           | Leucine       |
| Lysine        | 1.32                                    | 3.66  | 2.34  | 0.03  | 0.528 | 5.05  | 6.59                                                  | 1.54  | 3.14  | 3.45 | 6.59  | 0.029   | 0.029                                                 | 0.033       | 3.290 | 0.908 | 5.875      | 7.535          | YES          | Lysine        |
| Methionine    | 0.05                                    | 4.48  | 4.43  | 0.013 | 0.543 | 1.8   | 2.46                                                  | 0.66  | 1.15  | 1.31 | 2.46  | 0.012   | 0.012                                                 | 0.009       | 2.955 | 0.886 | 6.550      | 8.709          | no           | Methionine    |
| Phenylalanine | 0.68                                    | 2.2   | 1.52  | 0.02  | 0.609 | 3.52  | 4.28                                                  | 0.76  | 1.57  | 2.71 | 4.28  | 0.019   | 0.019                                                 | 0.018       | 3.889 | 0.934 | 6.751      | 8.867          | YES          | Phenylalanine |
| Proline       | 0.84                                    | 2.74  | 1.9   | 0.025 | 0.567 | 3.35  | 4.48                                                  | 1.13  | 1.68  | 2.80 | 4.48  | 0.023   | 0.023                                                 | 0.018       | 2.556 | 0.847 | 5.958      | 8.067          | no           | Proline       |
| Serine        | 0.68                                    | 3.15  | 2.47  | 0.021 | 0.422 | 3.36  | 4.28                                                  | 0.92  | 1.39  | 2.89 | 4.28  | 0.019   | 0.019                                                 | 0.016       | 3.176 | 0.901 | 6.286      | 8.050          | no           | Serine        |
| Taurine       |                                         |       | n/a   | 0.014 | 0.606 | 0.9   | 1.79                                                  | 0.89  | 1.96  | 0.82 | 2.79  | 0.012   | 0.012                                                 | 0.009       | 1.669 | 0.645 | 6.235      | 8.190          | n/a          | Taurine       |
| Threonine     | 0.28                                    | 18.94 | 18.66 | 0.018 | 0.485 | 3.18  | 4.02                                                  | 0.84  | 1.60  | 2.43 | 4.02  | 0.017   | 0.017                                                 | 0.016       | 3.015 | 0.890 | 6.331      | 7.940          | no           | Threonine     |
| Tryptophan    | 0.69                                    | 1.71  | 1.02  | 0.015 | 0.269 | 0.68  | 1.48                                                  | 0.8   | 0.93  | 0.55 | 1.48  | 0.012   | 0.012                                                 | 0.009       | 1.681 | 0.647 | 5.504      | 7.767          | no           | Tryptophan    |
| Tyrosine      | 0.53                                    | 1.93  | 1.4   | 0.016 | 0.503 | 2.43  | 3.05                                                  | 0.62  | 0.93  | 0.93 | 2.12  | 0.014   | 0.014                                                 | 0.013       | 3.393 | 0.913 | 6.247      | 8.383          | no           | Tyrosine      |
| Valine        | 0.16                                    | 2.03  | 1.87  | 0.024 | 0.576 | 4.31  | 5.2                                                   | 0.89  | 0.18  | 0.05 | 3.36  | 0.024   | 0.024                                                 | 0.023       | 3.260 | 0.906 | 6.333      | 8.687          | no           | Valine        |
| Hydroxylysine |                                         |       | n/a   |       |       |       |                                                       |       | 0.93  | 0.29 | 1.21  | 0.010   | 0.010                                                 | 0.011       | 1.821 | 0.699 | 5.815      | 7.732          |              | Hydroxylysine |
| Crude Protein |                                         |       | n/a   | 0.369 | 0.88  | 10.04 | 15.05                                                 | 5.01  | 11.95 | 6.82 | 18.77 | 0.394   | 0.394                                                 | 0.406       | 5.521 | 0.967 | 6.401      | 8.599          |              | Crude Protein |
| Ash           |                                         |       | n/a   | 0.159 | 0.88  | 2.15  | 5                                                     | 2.85  | 3.32  | 2.21 | 5.53  | 0.154   | 0.154                                                 | 0.129       | 3.084 | 0.895 | 5.847      | 7.922          |              | Ash           |
| Crude Fat     |                                         |       | n/a   | 0.195 | 0.864 | 1.79  | 4.76                                                  | 2.97  | 6.95  | 0.00 | 6.95  | 0.310   | 0.311                                                 | 0.316       | 3.883 | 0.934 | 6.515      | 8.217          |              | Crude Fat     |
| Moisture      |                                         |       | n/a   | 0.237 | 0.95  | 6.41  | 10.35                                                 | 3.94  | 3.76  | 6.41 | 10.17 | 0.183   | 0.183                                                 | 0.159       | 6.579 | 0.977 | 5.099      | 6.832          |              | Moisture      |
| TotalAA       |                                         |       | n/a   |       |       |       |                                                       |       | 10.06 | 5.84 | 15.90 | 0.413   | 0.413                                                 | 0.328       | 4.018 | 0.938 | 6.385      | 7.963          |              | TotalAA       |

**Appendix III** - Scatter plots of predicted (V3 NIR calibration) and observed values (i.e. reference values), in addition to calibration metrics, for each parameter. Image Credit – David Honigs (PerkinElmer)

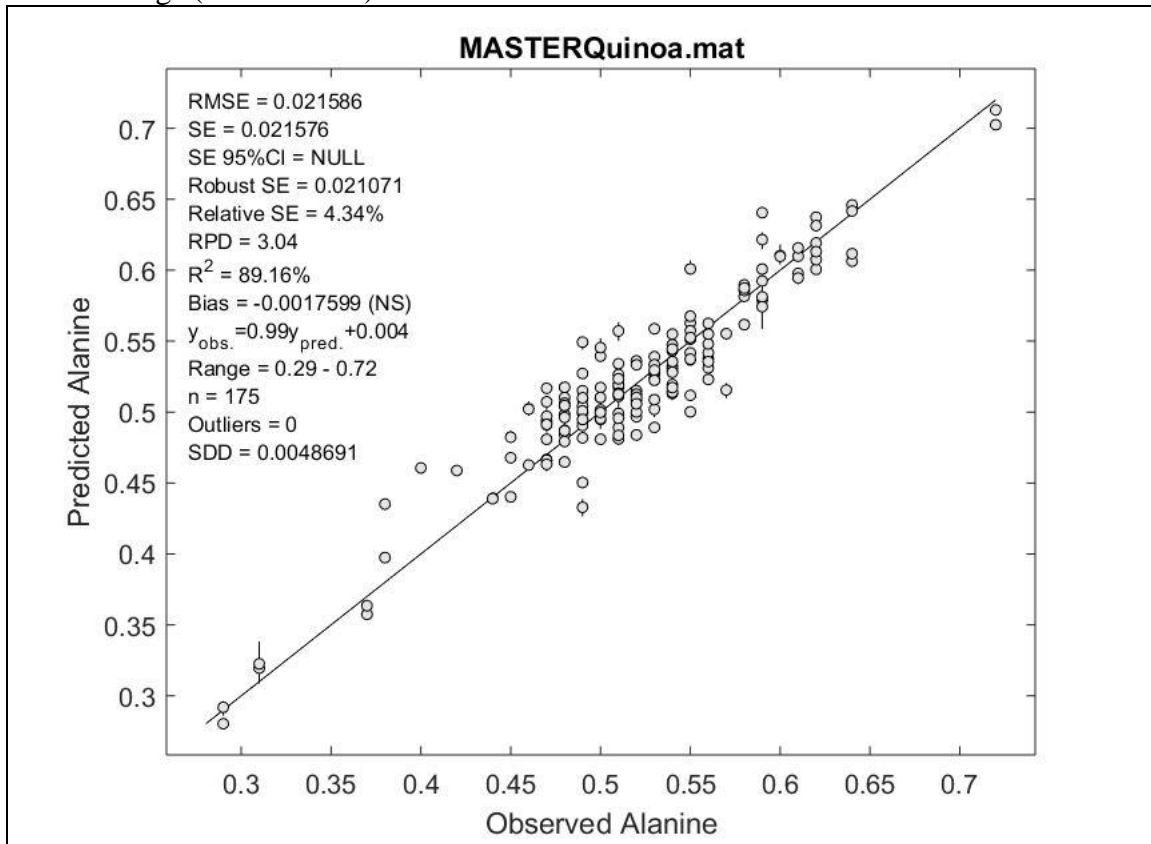

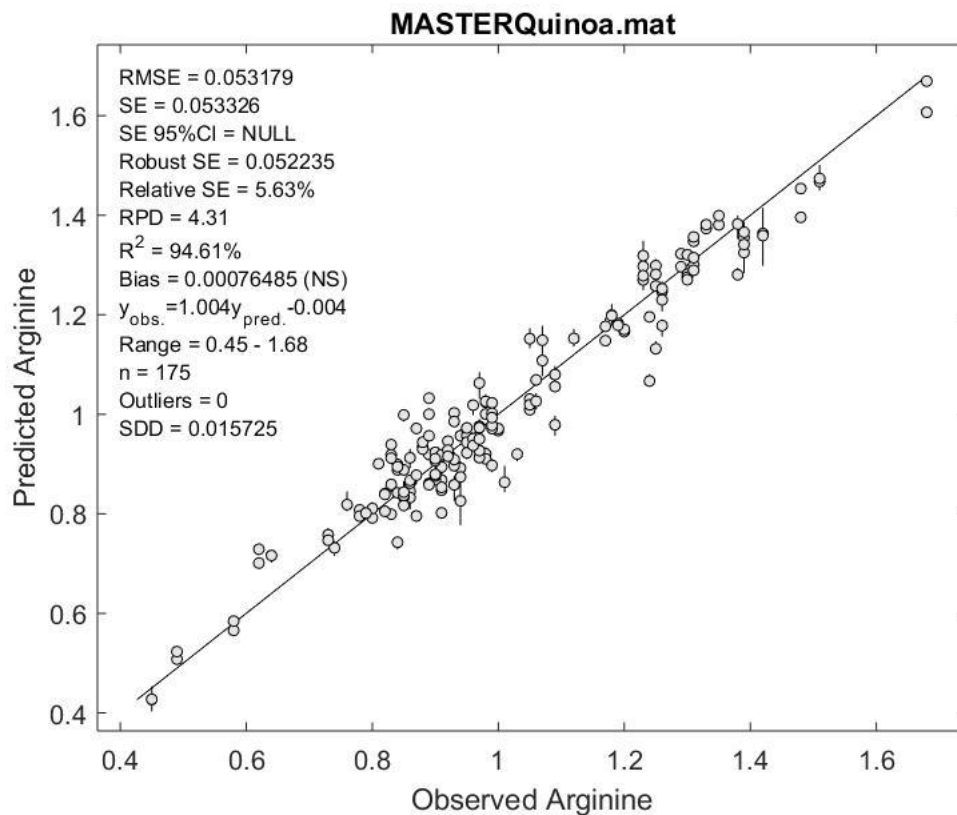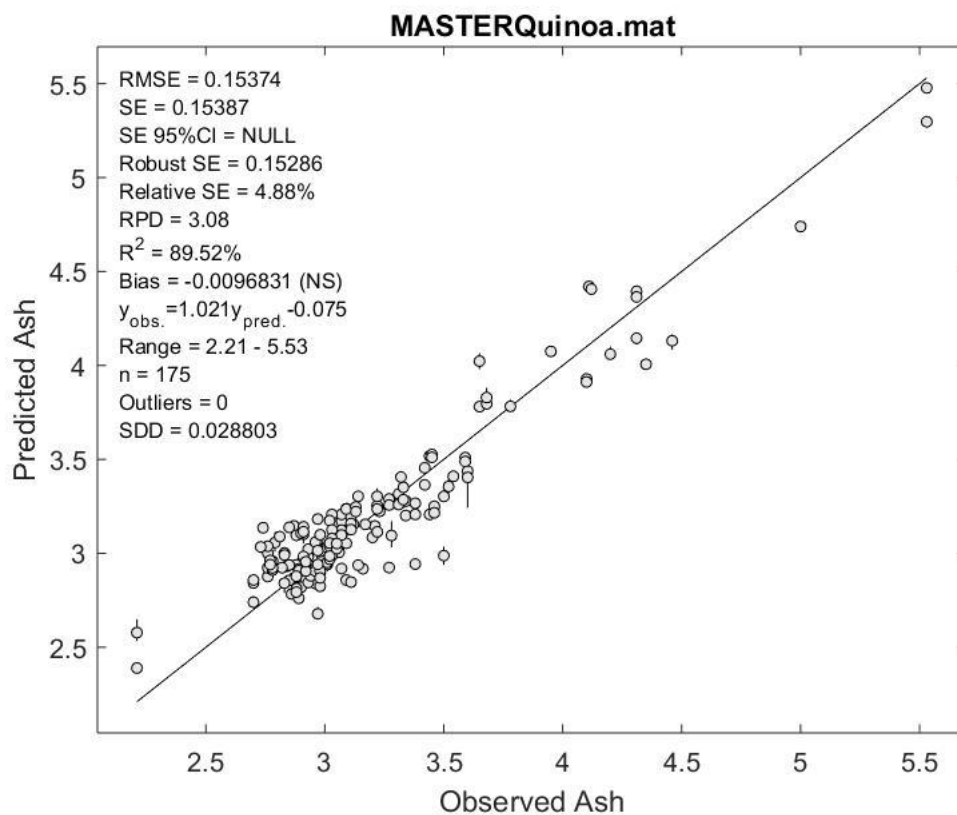



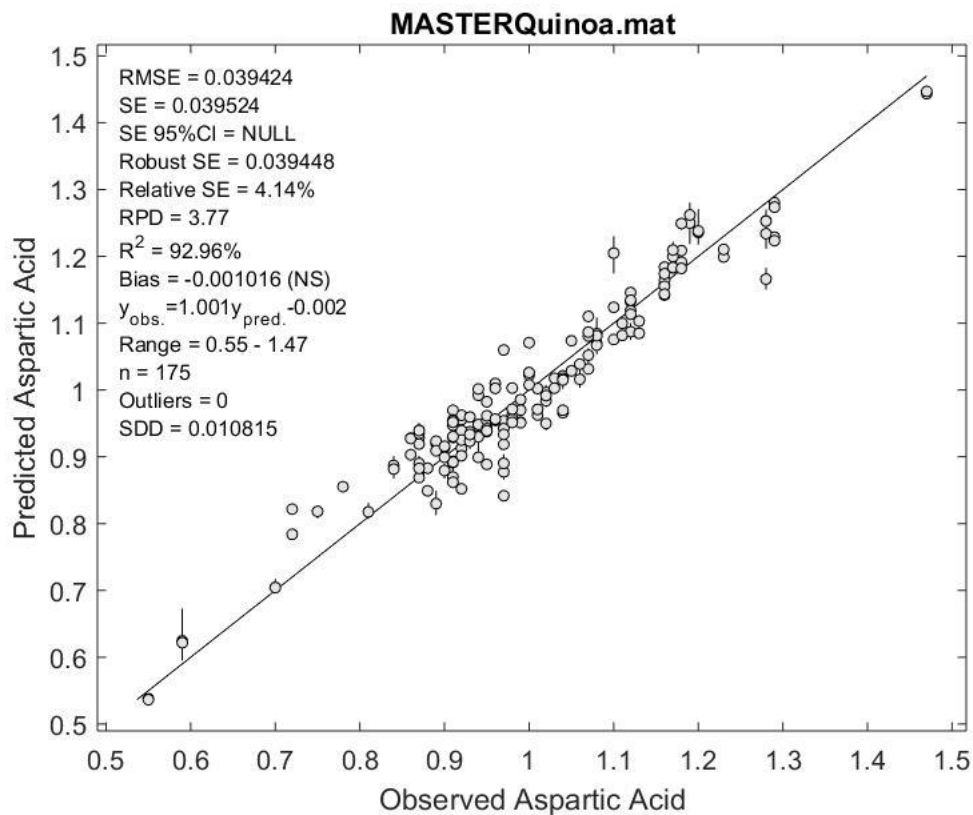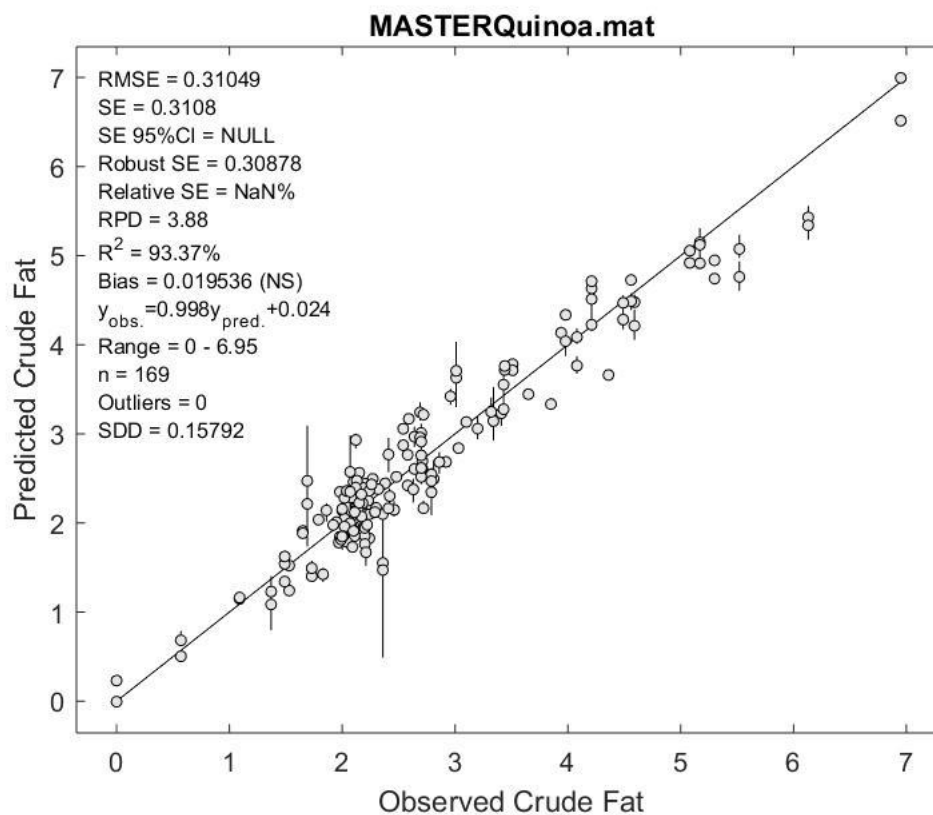

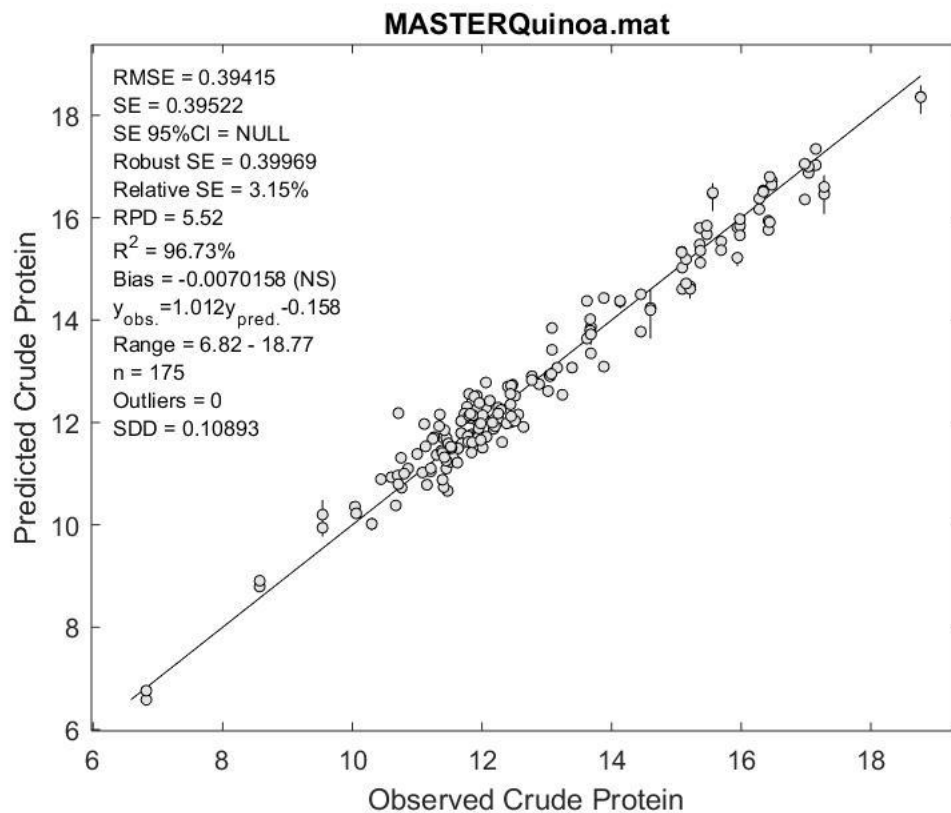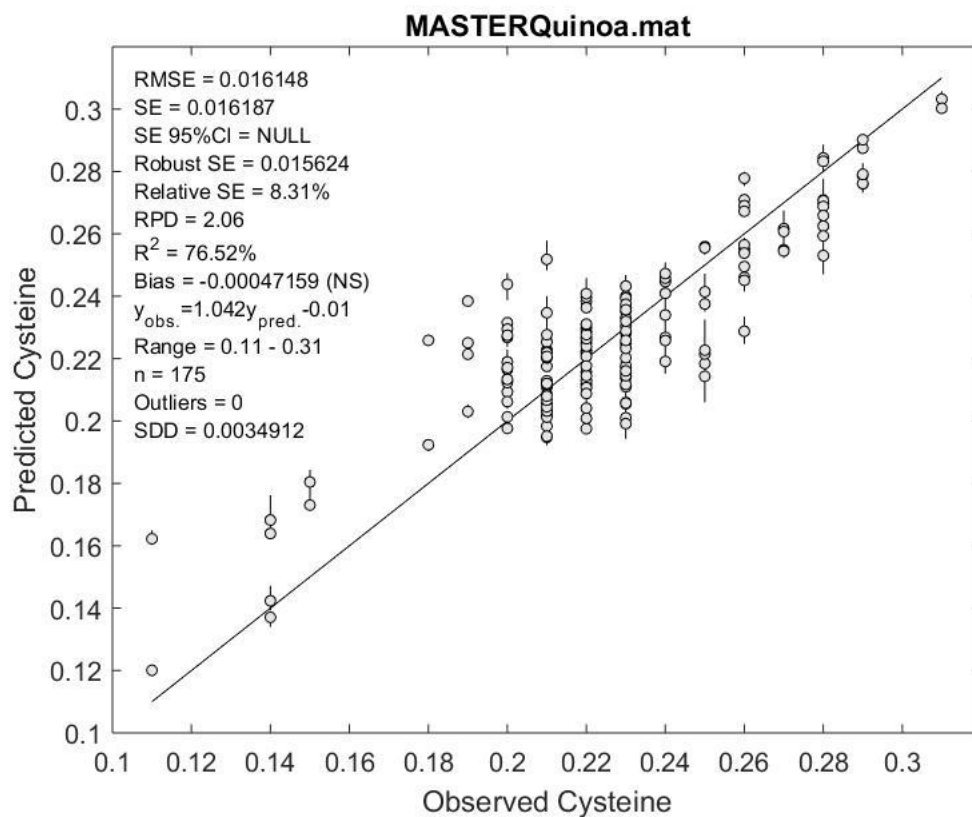

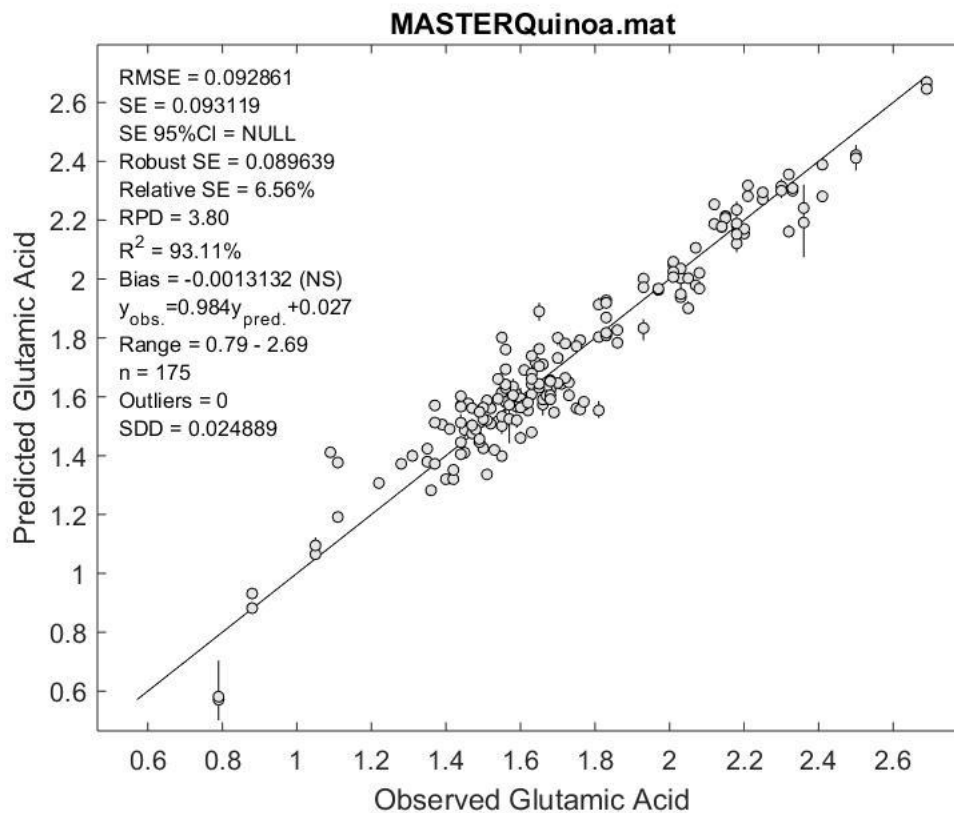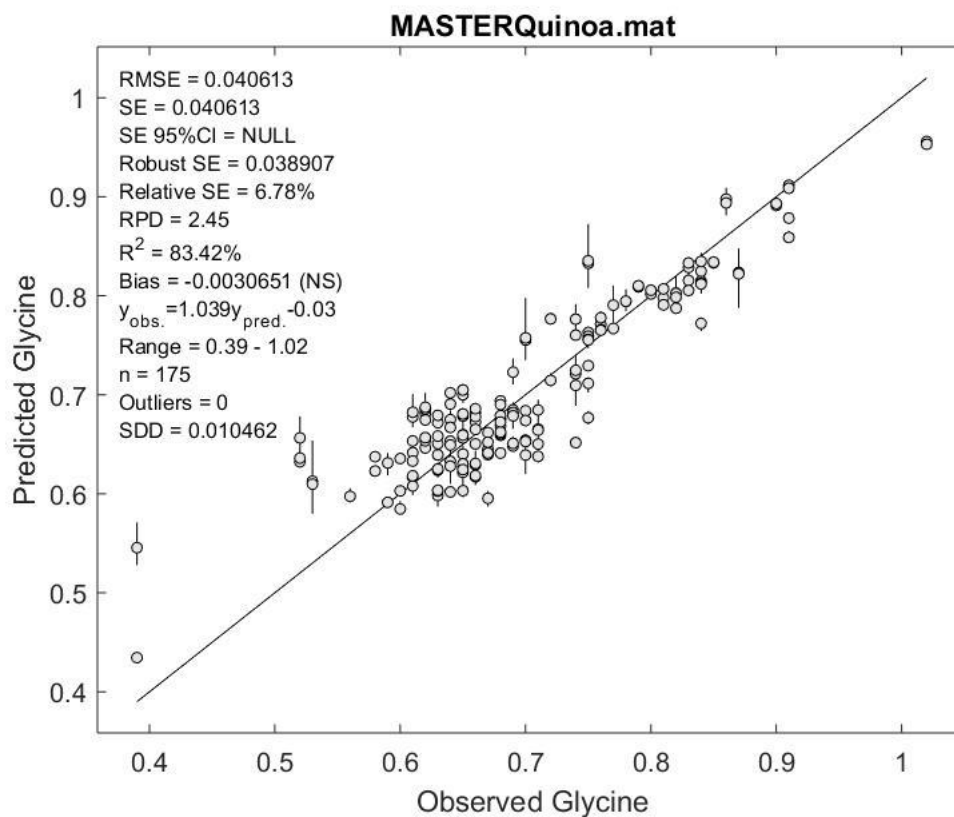

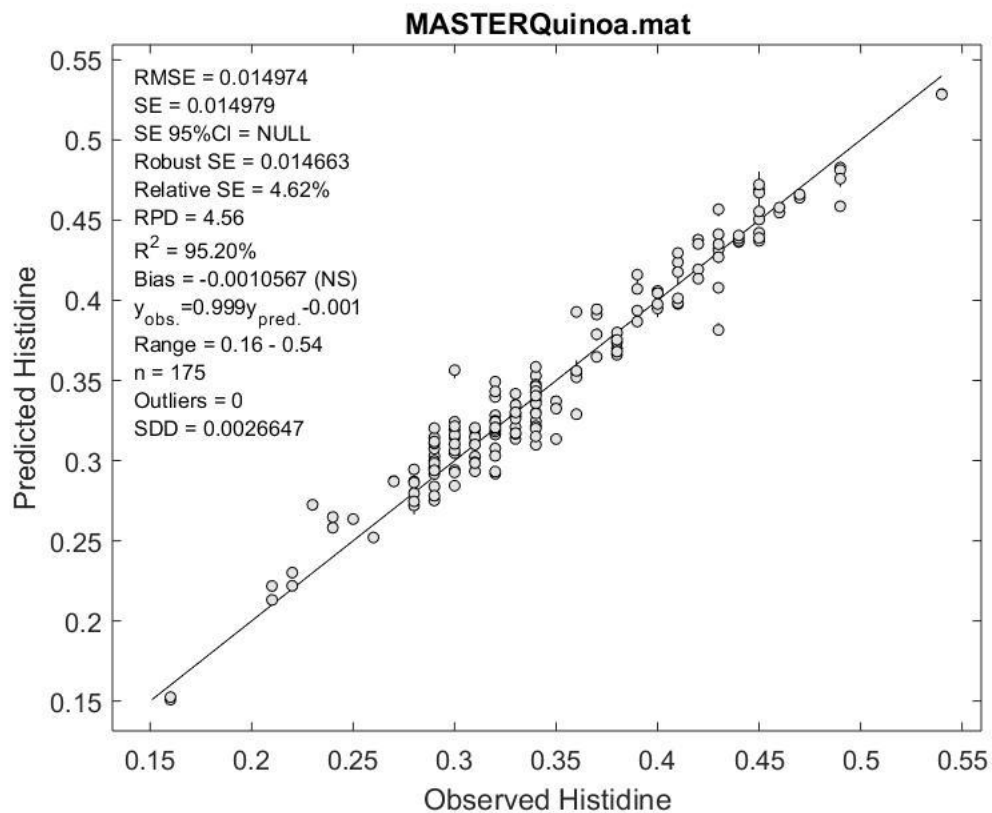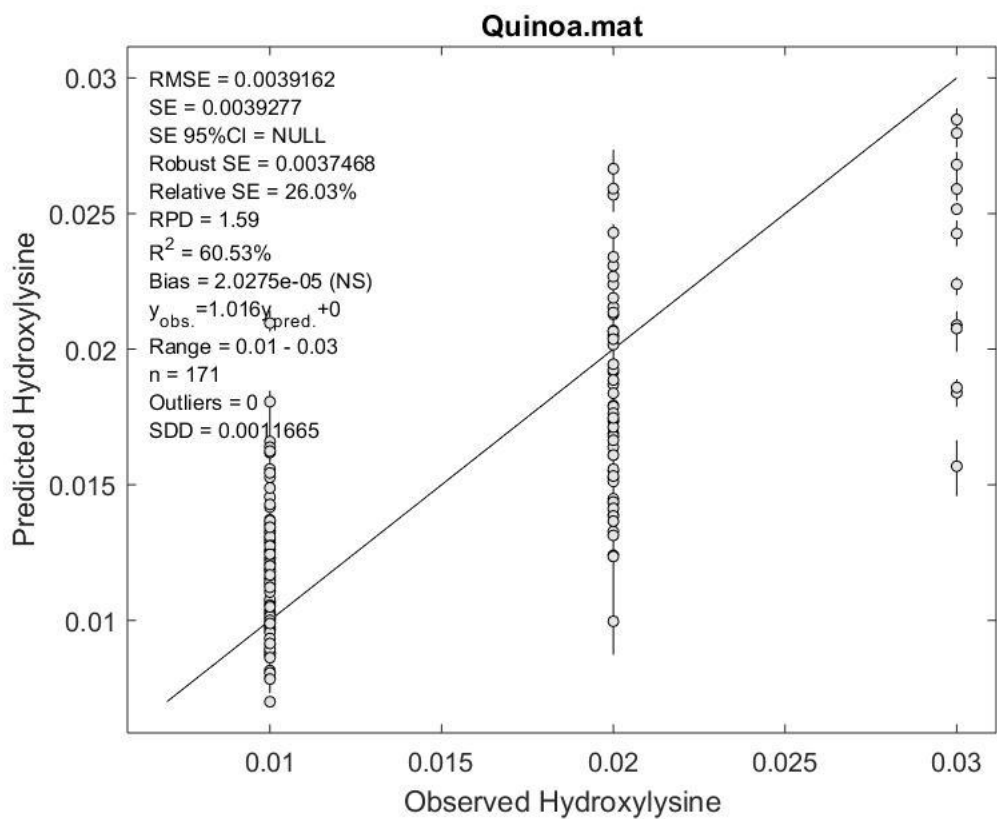

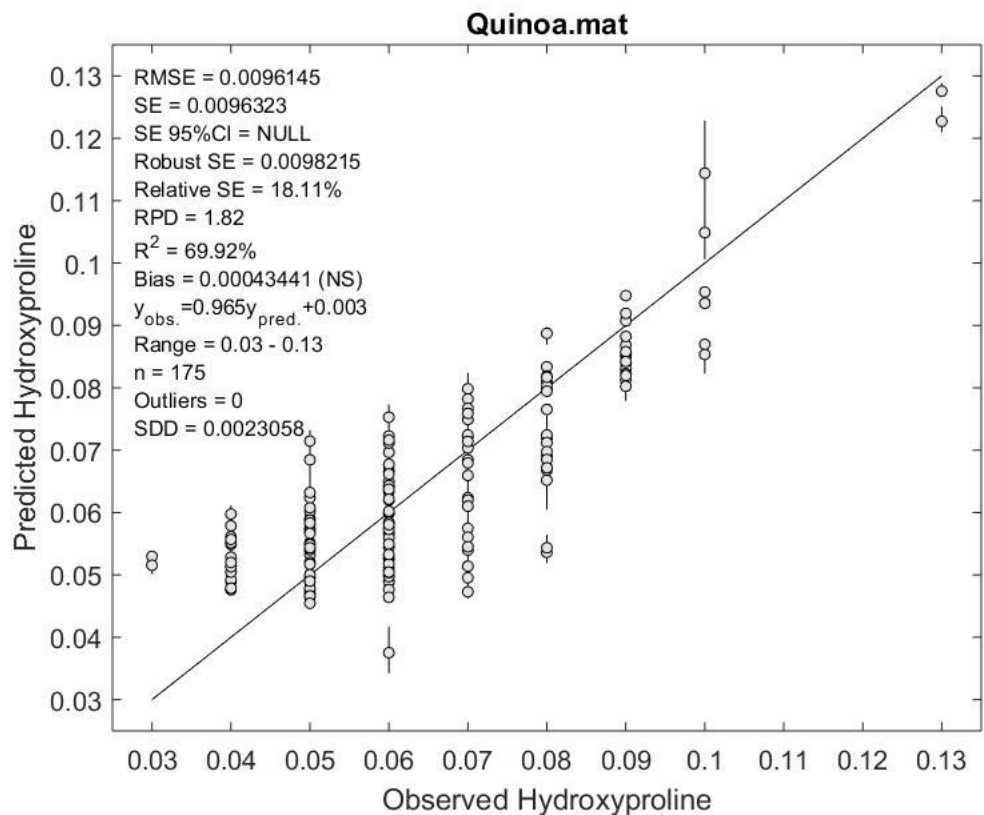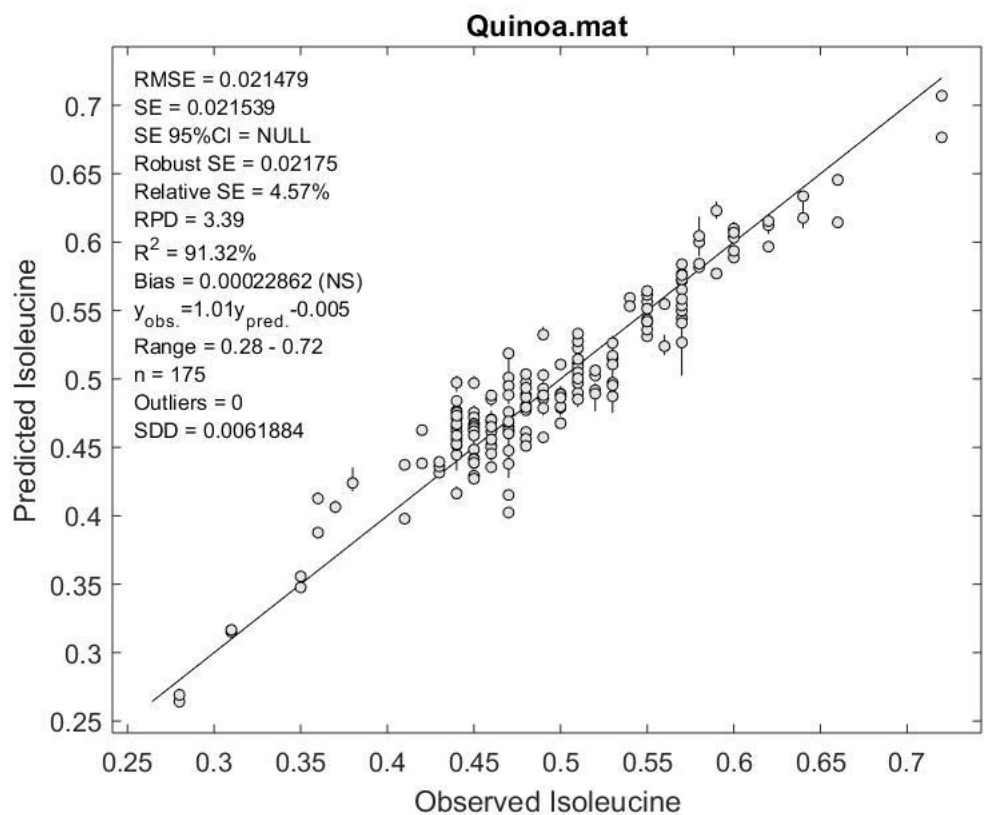

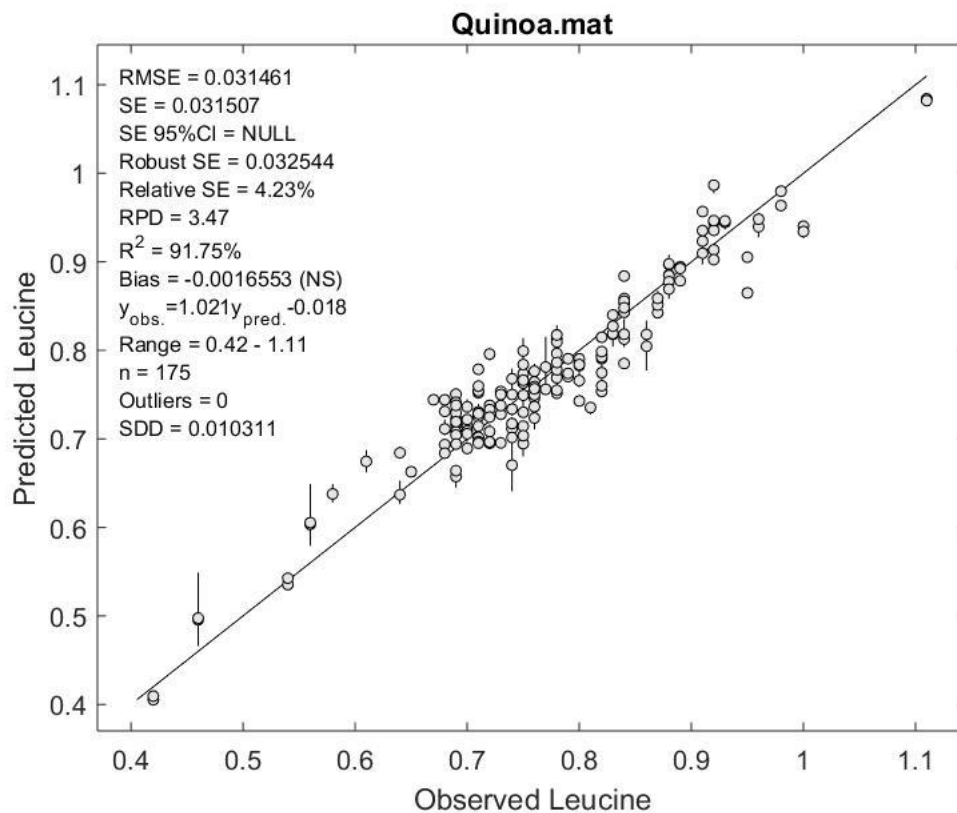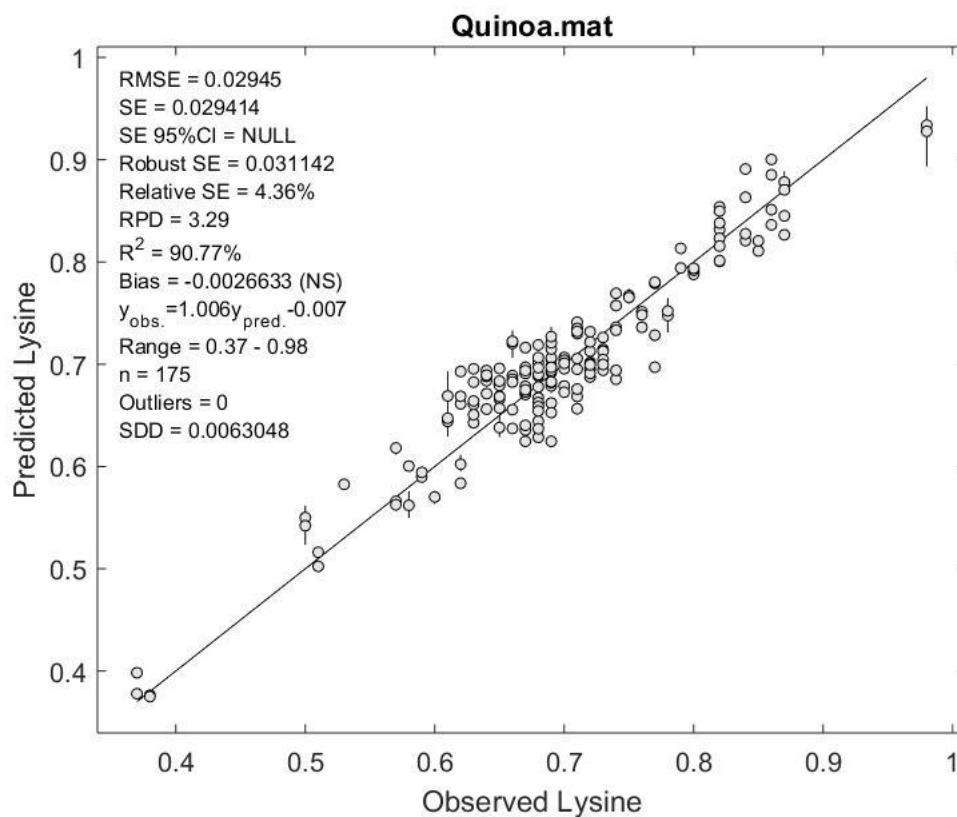

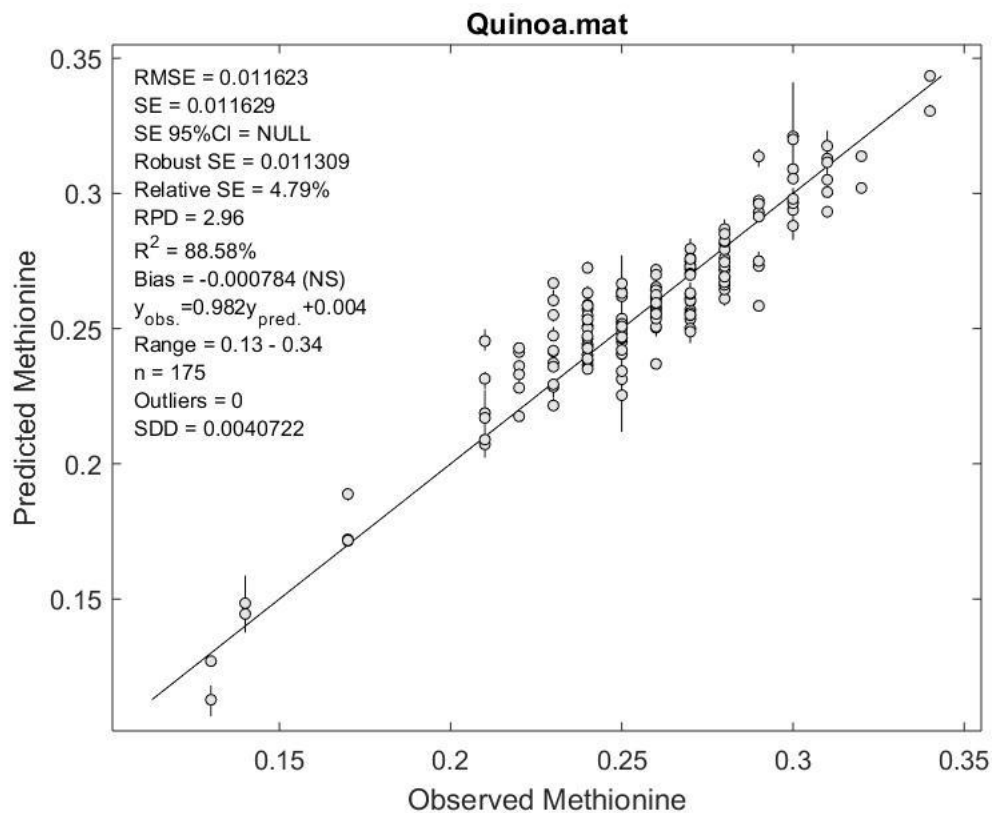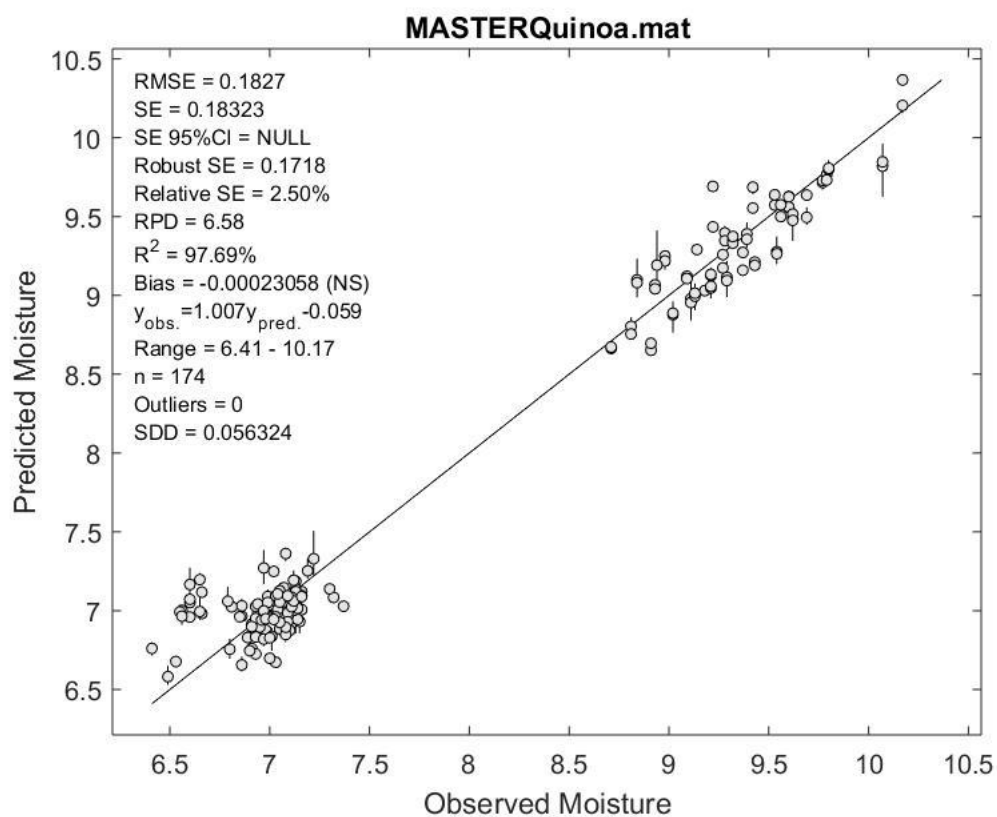



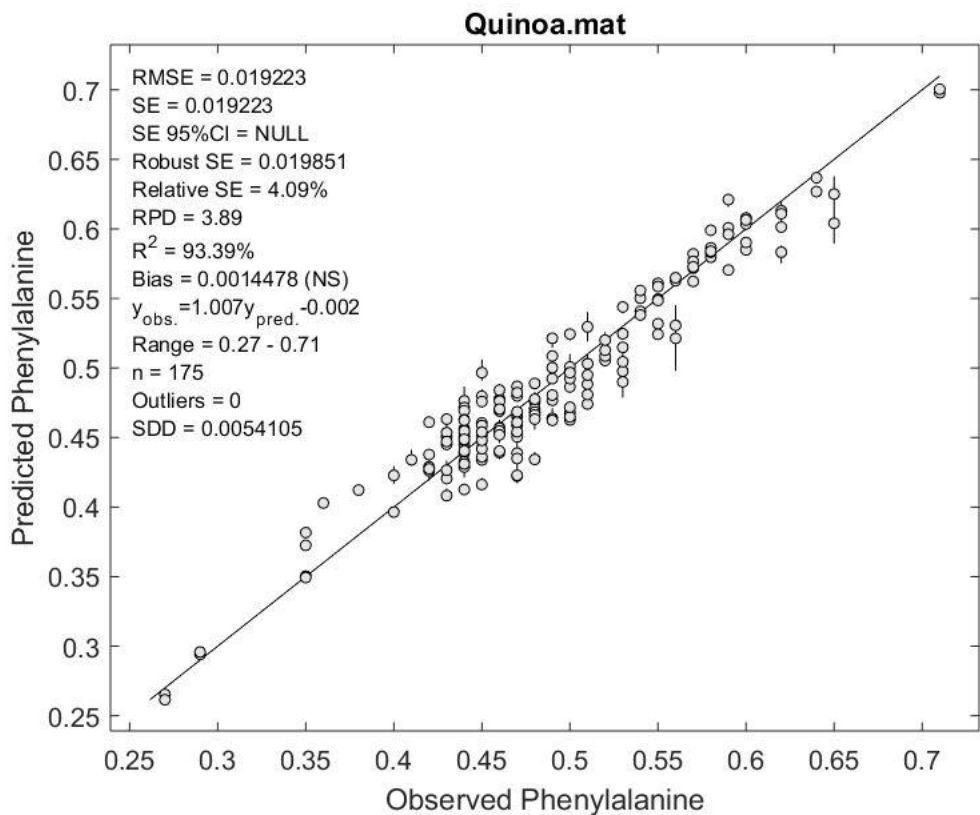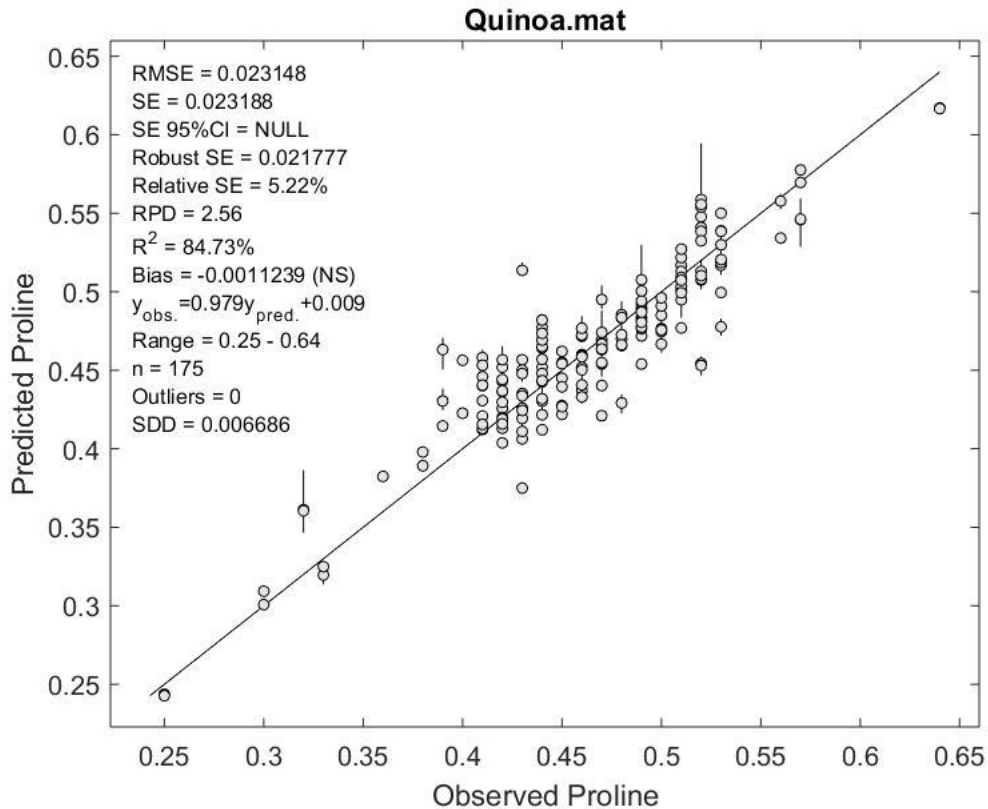

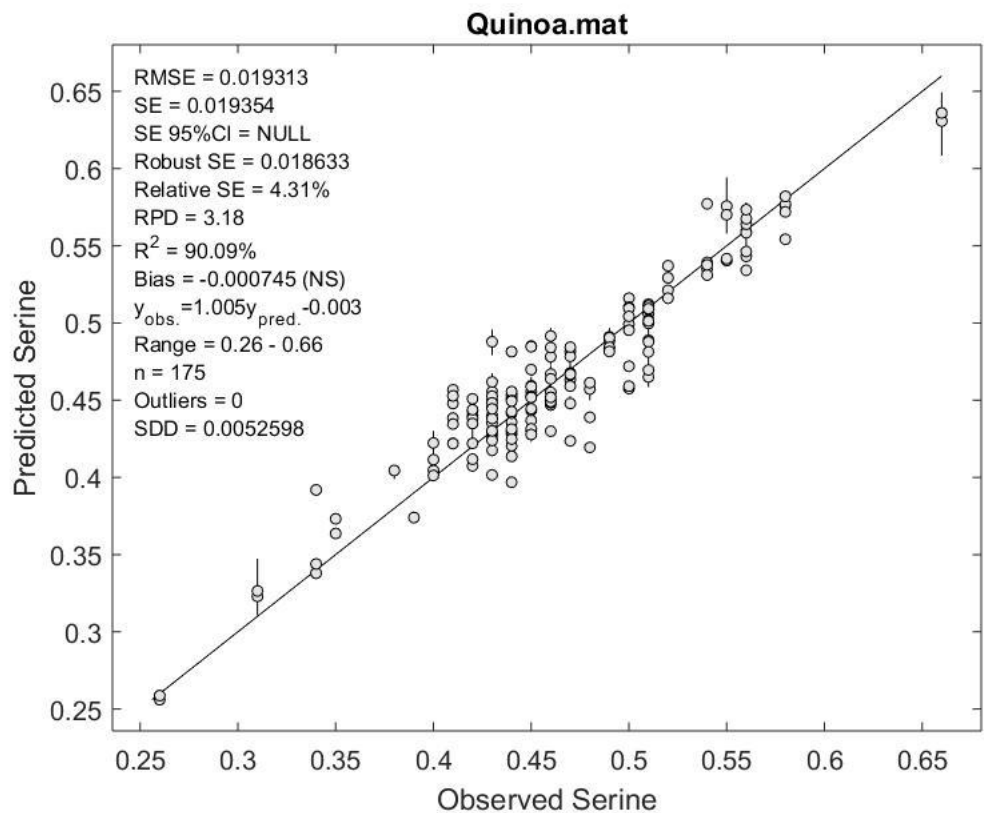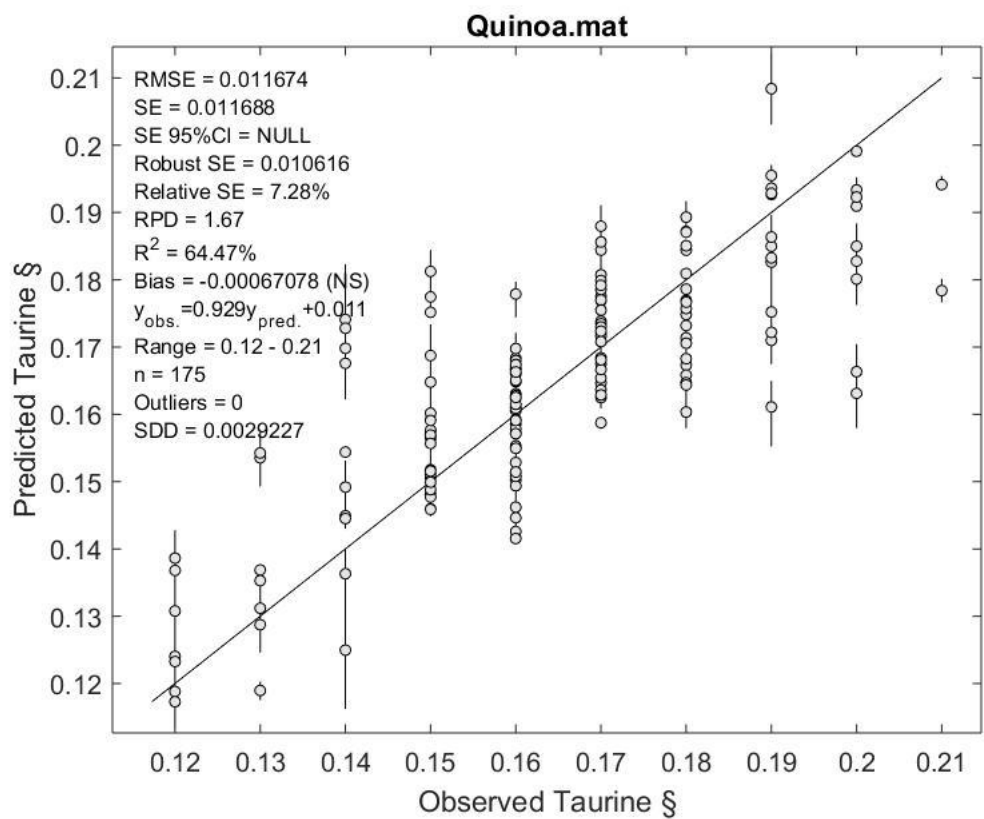

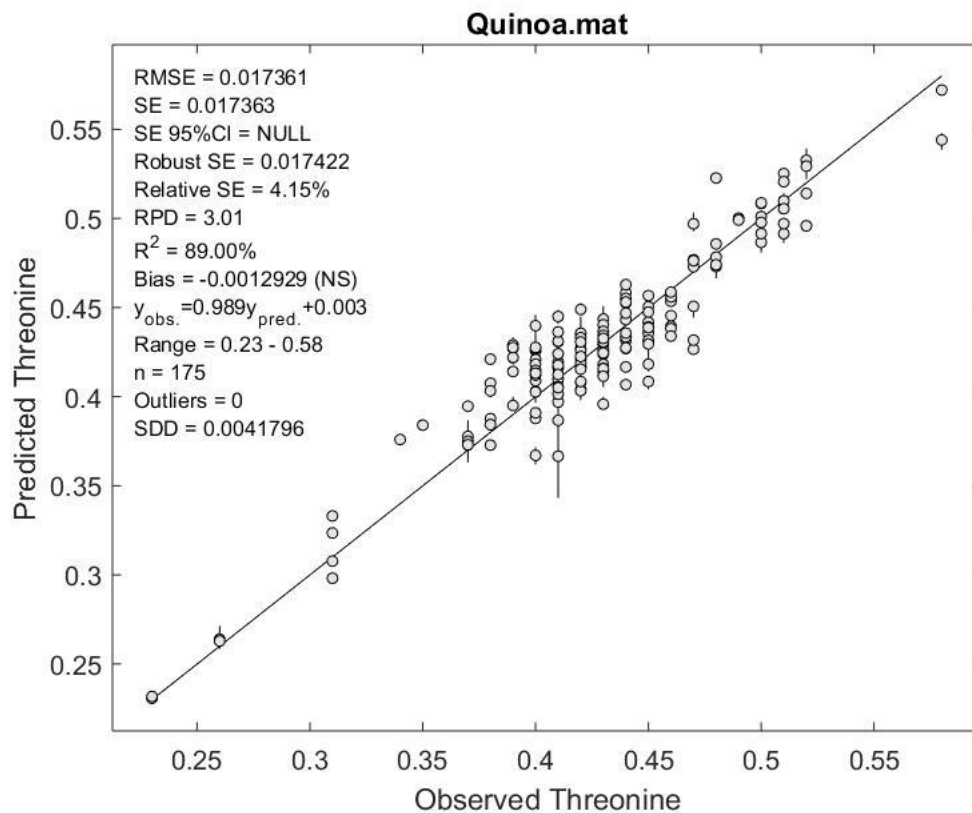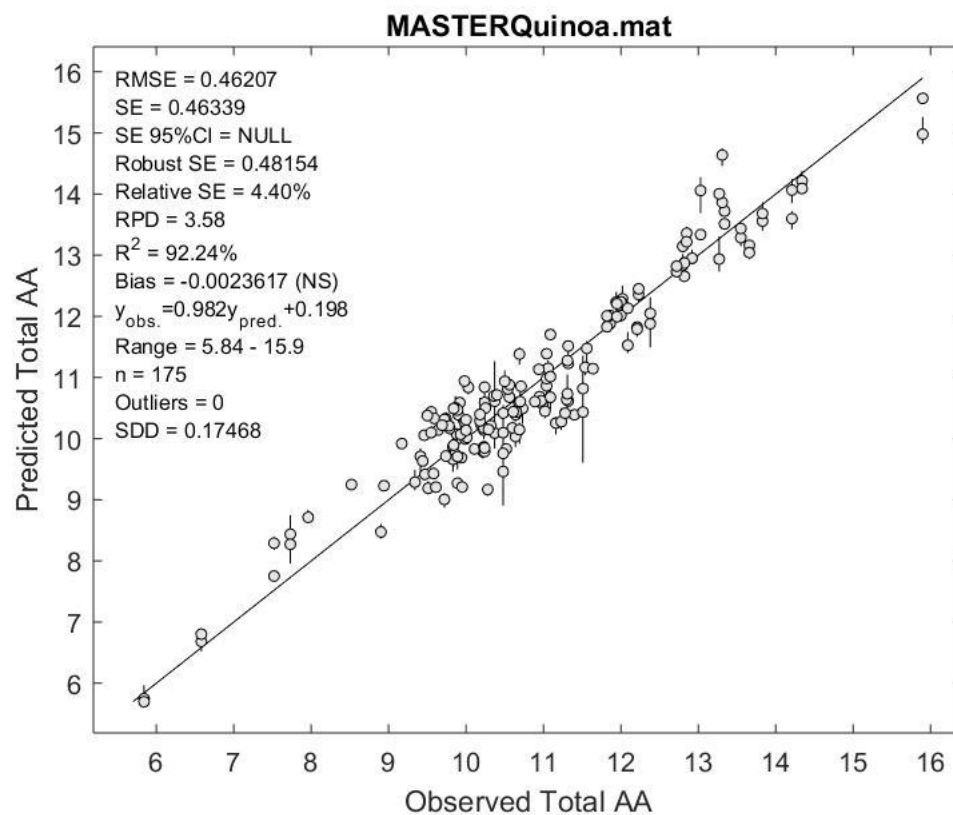

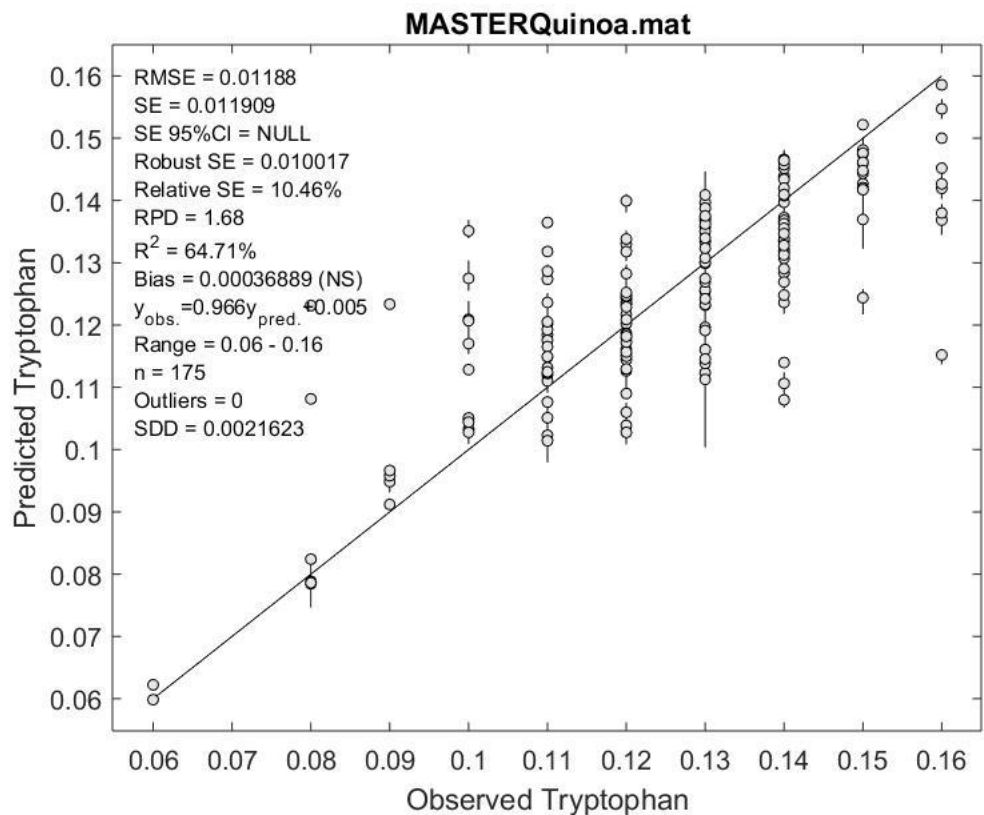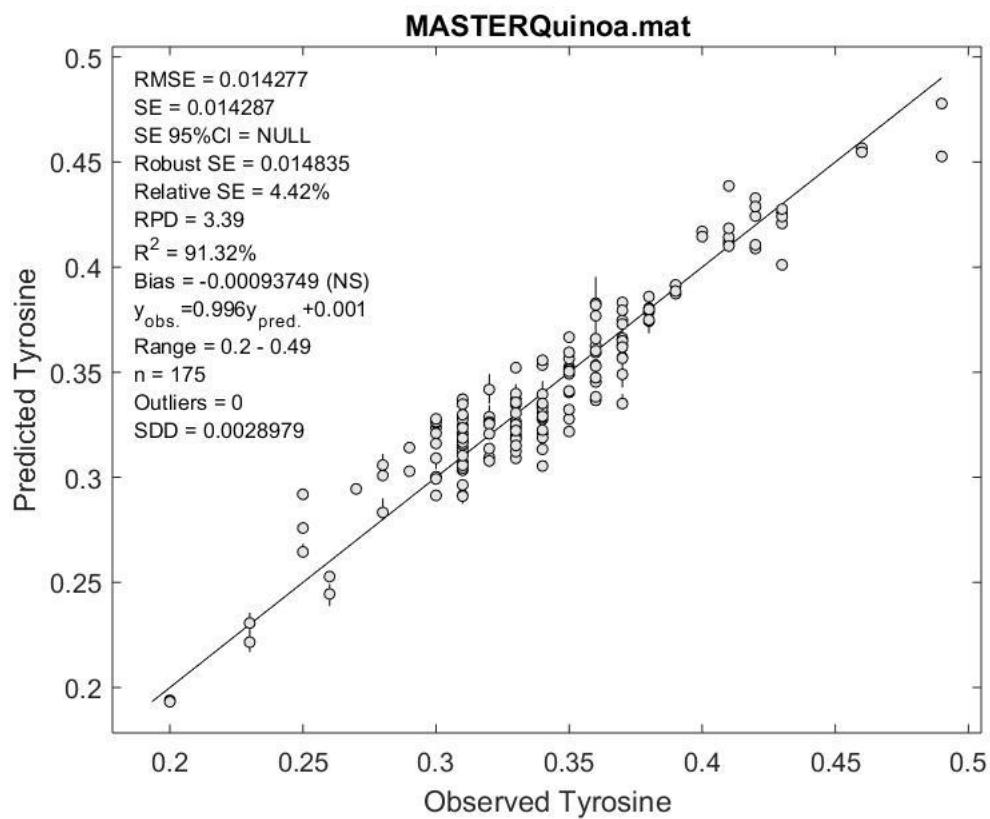

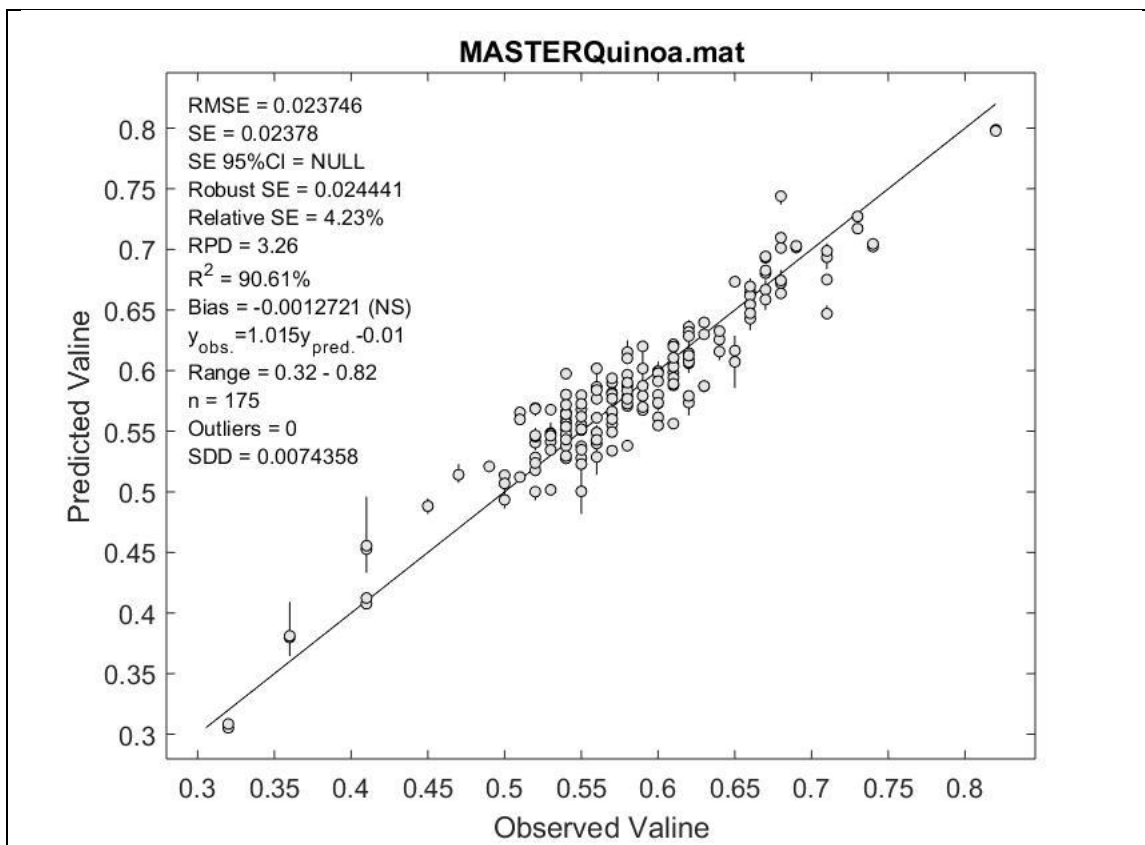

Supplement: s1 [file s1]
