# Supplementary material for: Quinoa Phenotyping Methodologies: An International Consensus
Source: MDPI journal article supplement (doi:10.3390/plants10091759), 2021-08-24
Supplement: s1 [file s1]

## Supplementary file 2: Blue card template

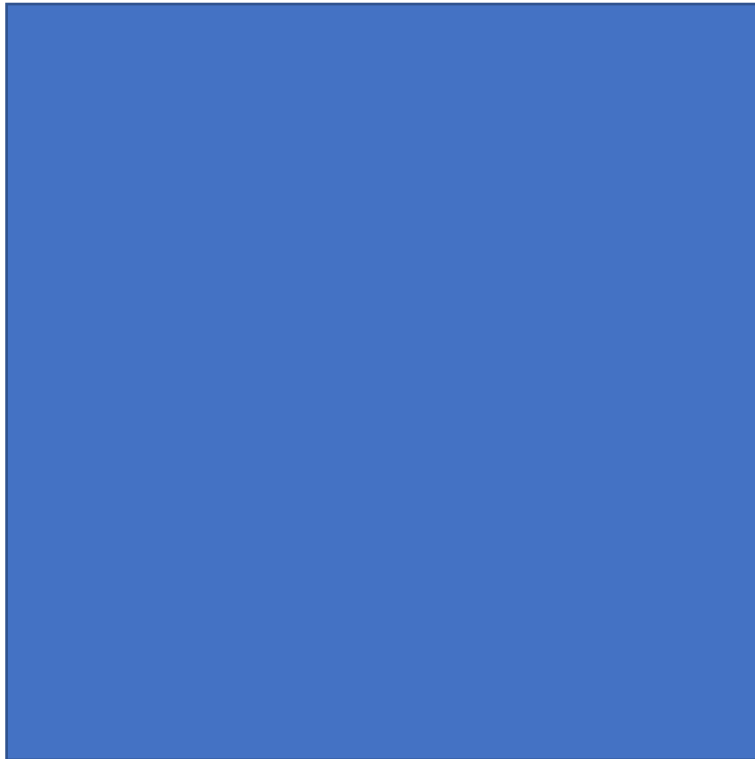

This template for the blue card is in the dimensions needed ( $10 \times 10 \text{ cm}^2$  square) for use of the in-field seed morphology descriptor method (section 9.2.1). It may be printed on a paper of medium to heavy weight and cut out before use.
