# Supplementary material for: Quinoa Phenotyping Methodologies: An International Consensus
Source: MDPI journal article supplement (doi:10.3390/plants10091759), 2021-08-24
Supplement: s1 [file s1]

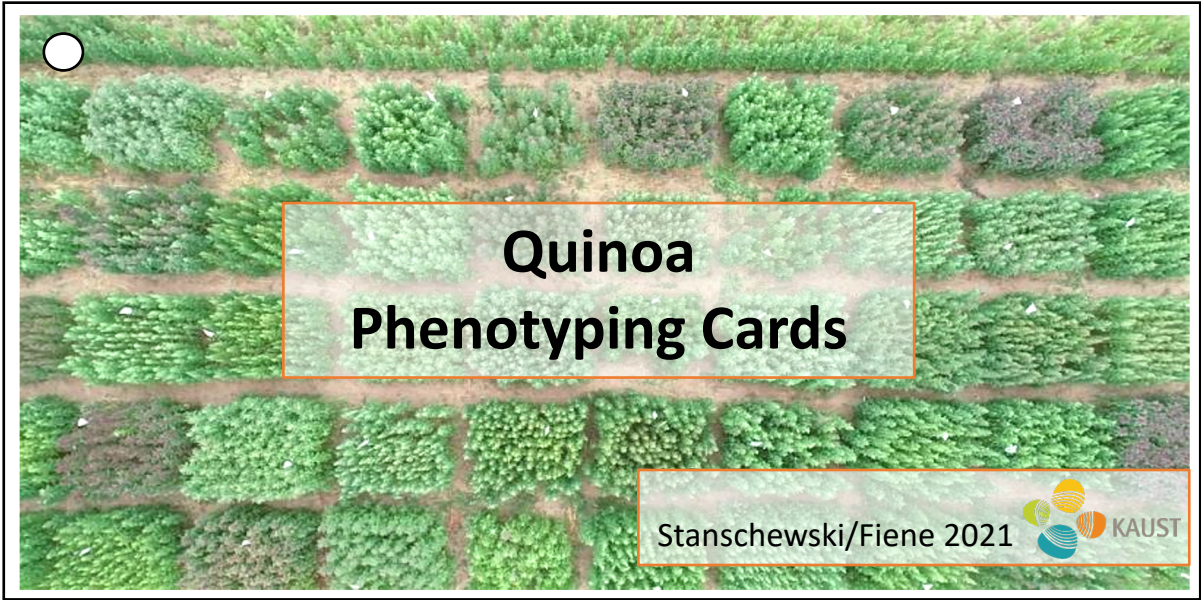

**Plot population homogeneity**

| 1                                              | 3                             | 5                                                            | 7                                                   |
|------------------------------------------------|-------------------------------|--------------------------------------------------------------|-----------------------------------------------------|
|                                                |                               |                                                              |                                                     |
| Most plants are the same (up to 10% different) | 10 to 30% of plants different | 30 to 50% of plants different (less than half are different) | Over 50% of plants are different (completely mixed) |

**Growth habit**

| 1                    | 3                                                 | 5                                                  | 7                                |
|----------------------|---------------------------------------------------|----------------------------------------------------|----------------------------------|
|                      |                                                   |                                                    |                                  |
| Not branched at base | Some branching from base, no significant panicles | Branching from base with more significant panicles | Main panicle can't be identified |

## Growth habit examples

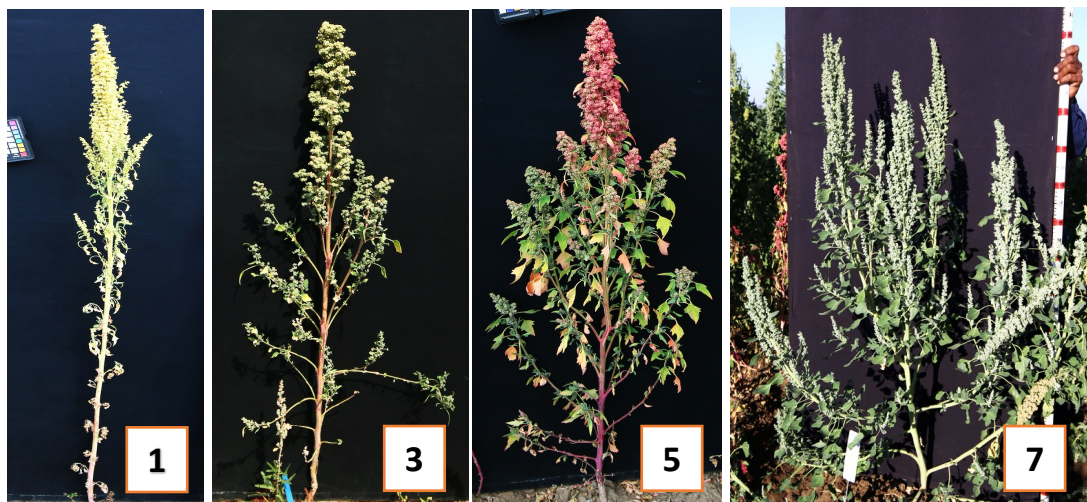

### Stem breakage

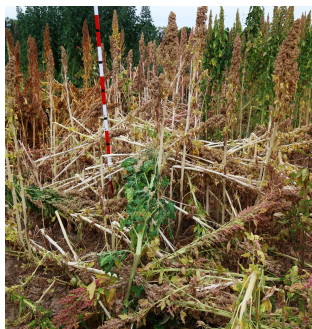

### Stem lodging

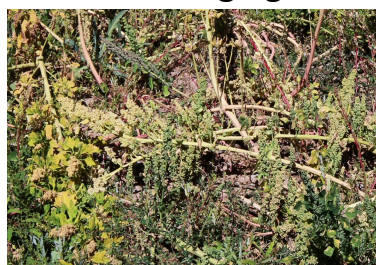

### Percentage of the plot affected

1- up to 20%

3 ~ 30% (20% – 40%)

5 ~ 50% (40% – 60%)

7 ~ 70% (60% – 80%)

9 - over 80 %

### Stem lying

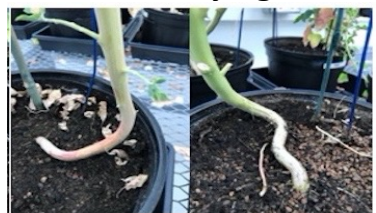

Seeds

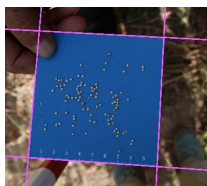

## Stem angle

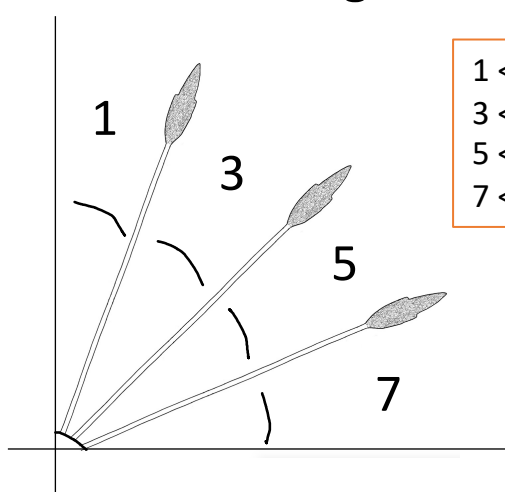

1 < 22.5°

3 < 45°

5 < 67.5°

7 < 90°

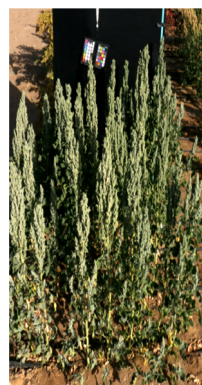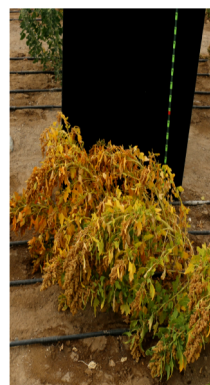

Erectness of the stems of the majority of the plot:

1 = "soldiers" to

7 = plants are severely lodged and on or near the ground

## Panicle axis angle

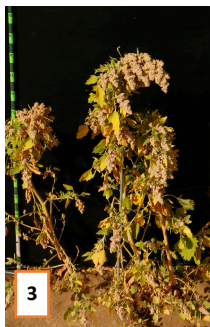

$1 < 45^\circ$   
 $3 < 90^\circ$   
 $5 < 135^\circ$   
 $7 < 180^\circ$

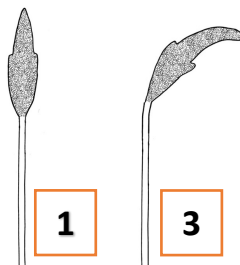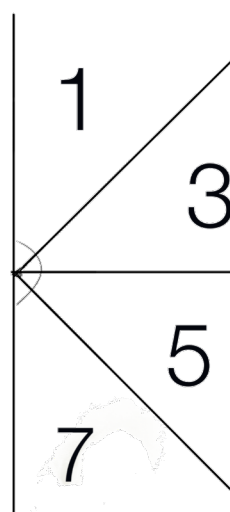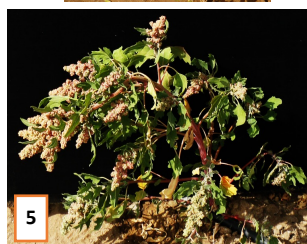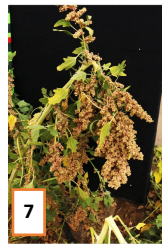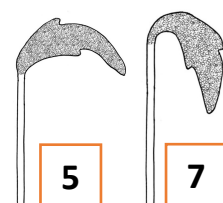

## Panicle shape

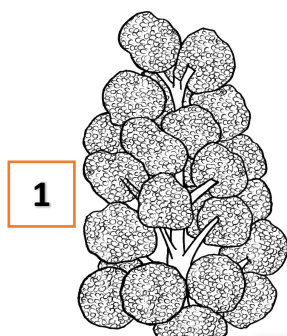

**Glomerulate:**  
 glomerules with  
 globose shape—  
 “bulbous clusters”

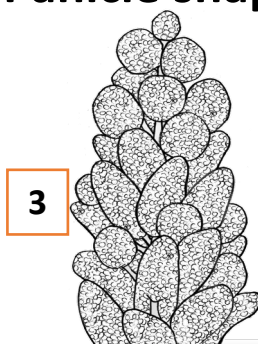

**Intermediate:** panicles  
 express both  
 amarantiform and  
 glomerulate traits

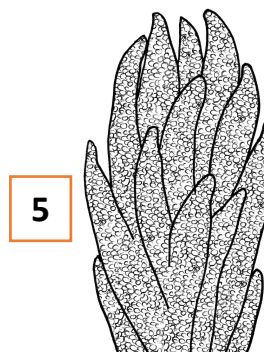

**Amarantiform:**  
 glomerules with  
 elongated shape –  
 “fingers”

## Panicle shape

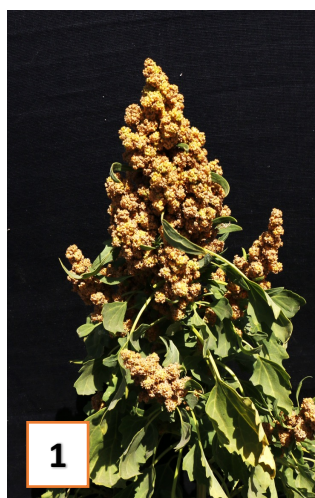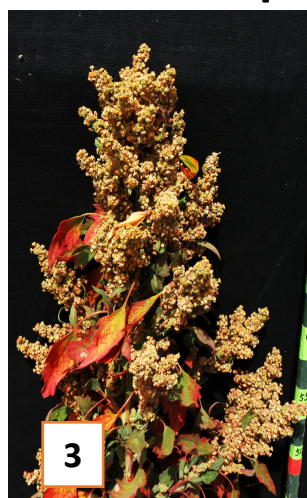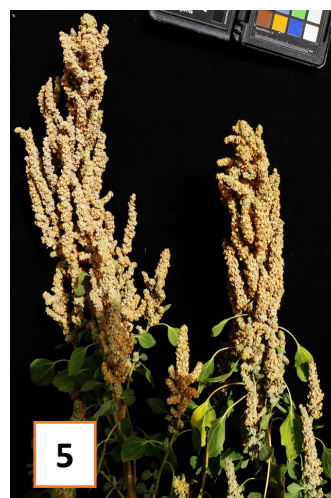

## Panicle density

1

Lax (loose)

Glomerules  
sparsely  
spaced,  
panicle axes  
easily visible

3

Intermediate

Glomerules  
tighter but with  
panicle axes still  
visible

5

Rarely seeing  
primary axis

7

Compact

Glomerules  
tightly packed,  
no panicle axes  
visible

## Panicle density

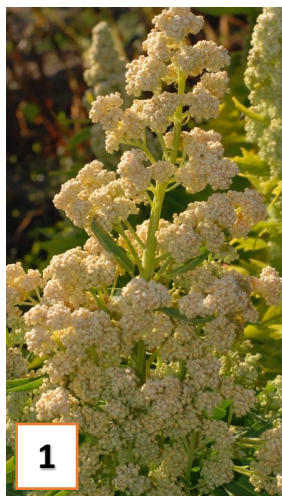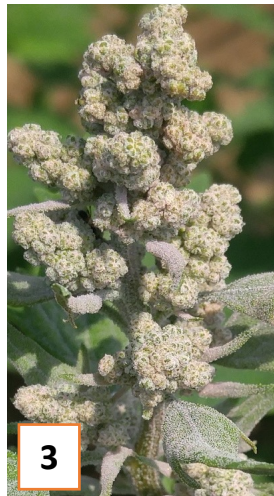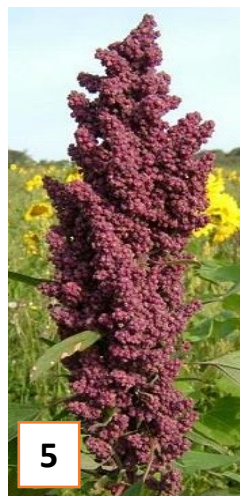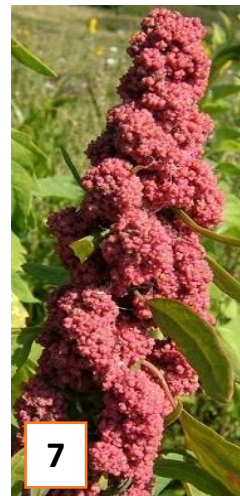

## Panicle leafiness

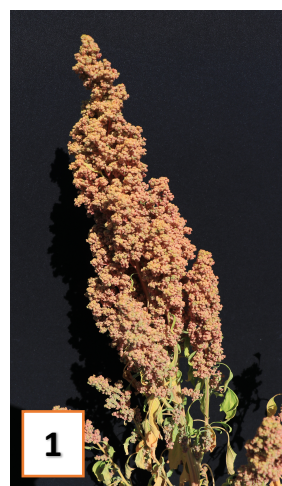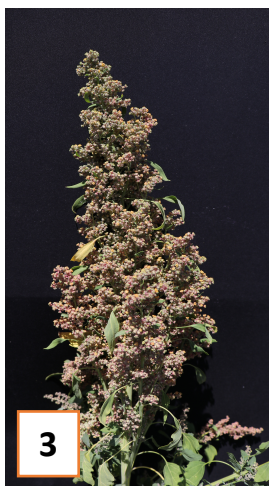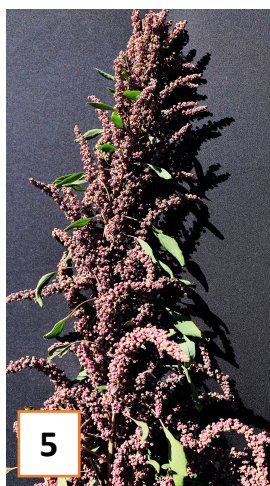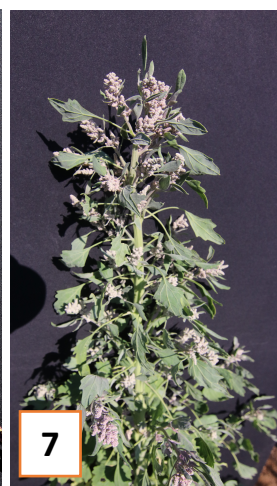

## Panicle color

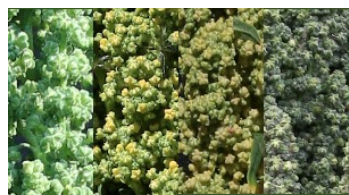

Green

13

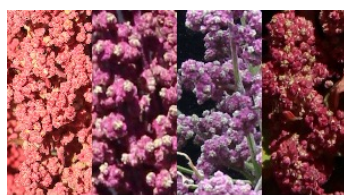

Pink / Purple / Red

4

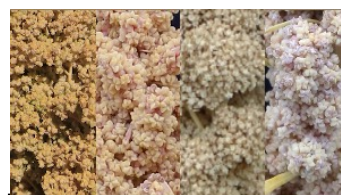

Beige / White

15

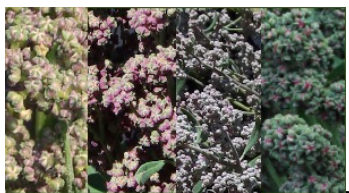

Green with Purple

16

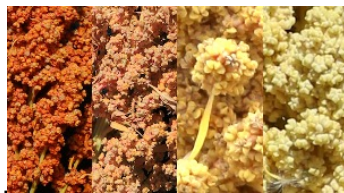

Orange / Yellow

5

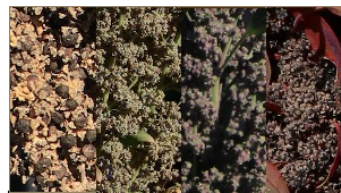

Dark coloured

7

## Stem leaf shape

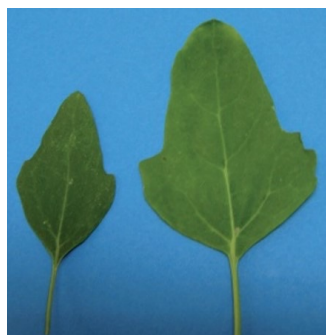

Rhomboidal (1)

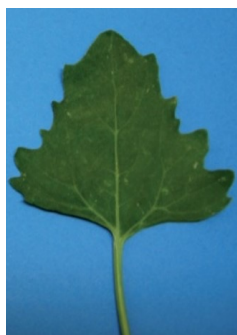

Triangular (2)

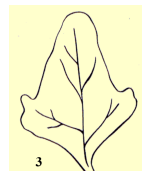

Entire (1)

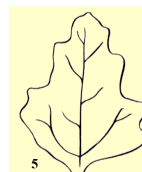

Dentate (3)

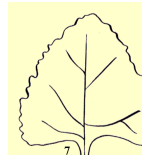

Serrate (5)

## Growth stage

Germination  
(0)

Leaf development  
(1)

Flowering  
(6)

Ripening  
(8)

Senescence  
(9)

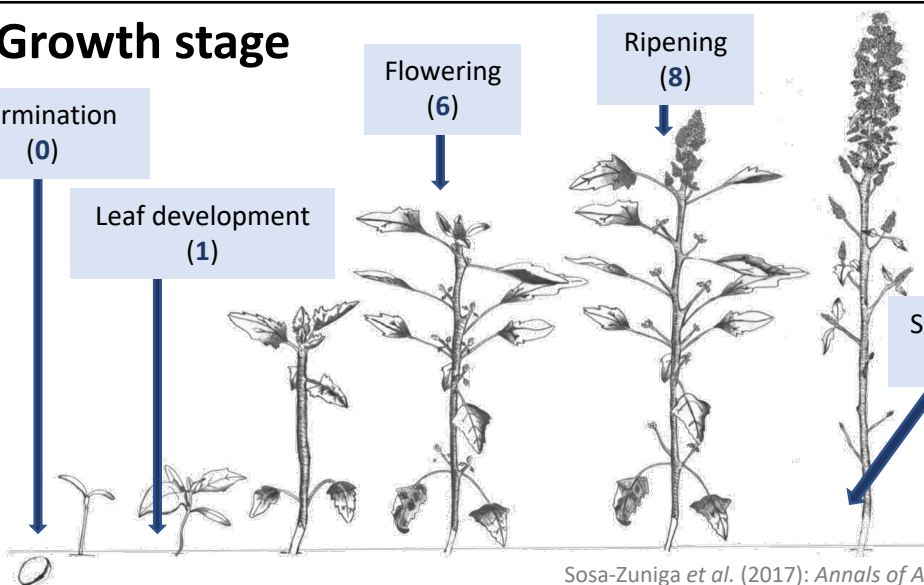

Sosa-Zuniga et al. (2017): *Annals of Applied Biology*

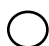

## BBCH Code Two-digit Description (Sosa-Zuniga et al. 2017)

### Principal growth stage 0: germination

- 00 Dry seed
- 01 Initiation of seed imbibition
- 03 Seed imbibition completed
- 05 Radicle emergence from seed
- 07 Emergence of hypocotyl
- 08 Hypocotyl with cotyledons growing towards soil surface
- 09 Emergence of cotyledons through soil

### Principal growth stage 1: leaf development

- 10 Cotyledons fully emerged
- 11 First pair of leaves visible
- 12 Second pair of leaves visible
- 19 Nine pair of leaves visible. If required, coding can continue following the same scheme.

### Principal growth stage 2: formation of side shoots

- 20 Visible lateral buds or expanded leaves without lateral stems
- 21 One side shoot visible
- 22 Two side shoots visible
- 29 Nine side shoots visible. If required, coding can continue following the same scheme.

### Principal growth stage 3: stem elongation (omitted)

### Principal growth stage 4: development of harvestable vegetative parts (omitted)

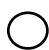

### Principal growth stage 5: inflorescence emergence

- 50 Inflorescence present but still enclosed by leaves
- 51 Leaves surrounding inflorescence separated, inflorescence is visible from above
- 59 Inflorescence visible, but all the flowers are still closed

### Principal growth stage 6: flowering

- 60 Beginning of anthesis: main inflorescence flowers with first extruded anthers
- 67 Early end of anthesis: main inflorescence flowers with first senesced anthers
- 69 Complete anthesis: main inflorescence flowers with senesced anthers

### Principal growth stage 7: fruit development

- 70 Fruit set: ovary thickening and first visible grains in the main stem

### Principal growth stage 8: ripening

- 81 Milky grain, easily crushed with fingernails, liquid content and green pericarp
- 85 Thick grain, easily crushed with fingernails, white pasty content, green, beige, red or black pericarp
- 89 Ripe grain, difficult to crush with fingernails, dry content, the grain has a beige, red or black color on its outside. Ready to harvest.

### Principal growth stage 9: senescence

- 91 Only basal leaves are dry
- 93 Leaves of the first half portion of the plant, starting from the base, are dead
- 95 All leaves are dead; stem colour turns from yellow to brown
- 97 Plant dead and dry
- 99 Harvested product

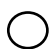

## BBCH scale examples

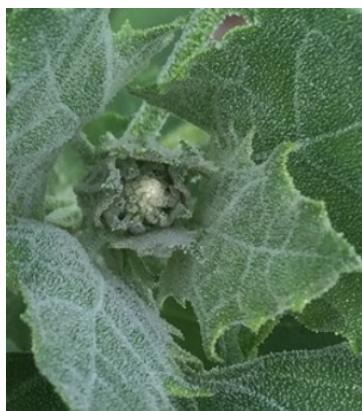

52

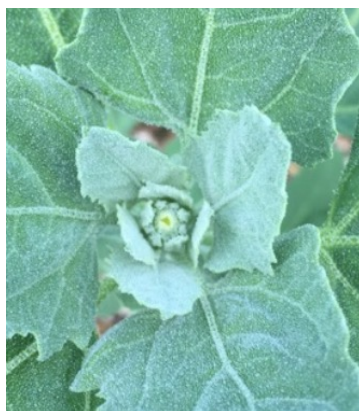

53

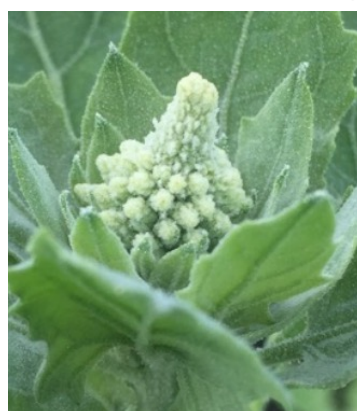

54

## BBCH scale examples

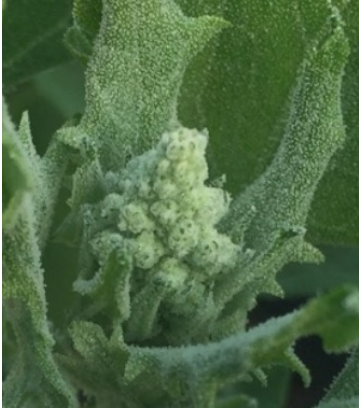

57

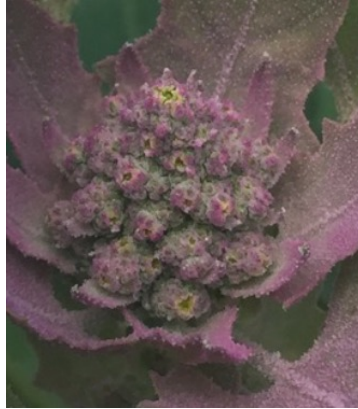

59

- Flowers still enclosed

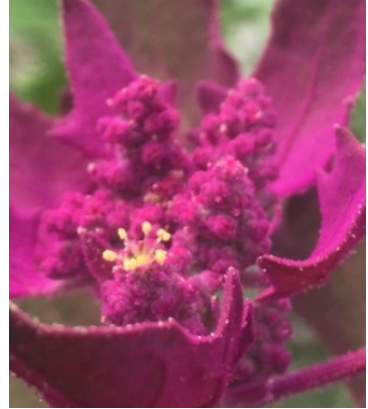

60

- First extruded anthers

## BBCH scale examples

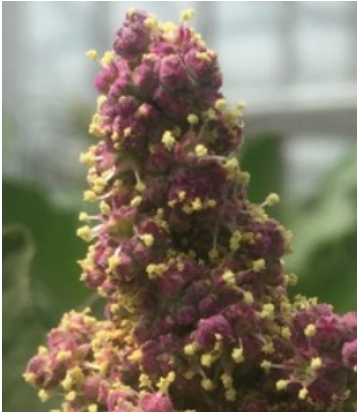

67

- Anther dehiscence

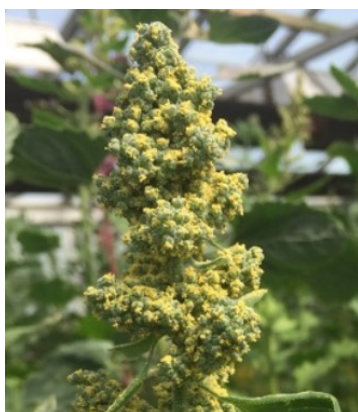

69

- Senesced anthers

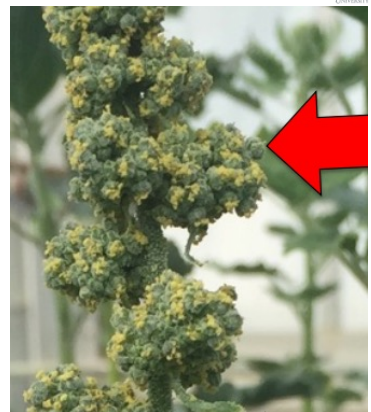

70

- Ovary thickening

## Diseases

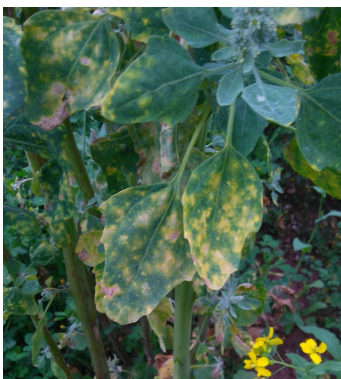

a

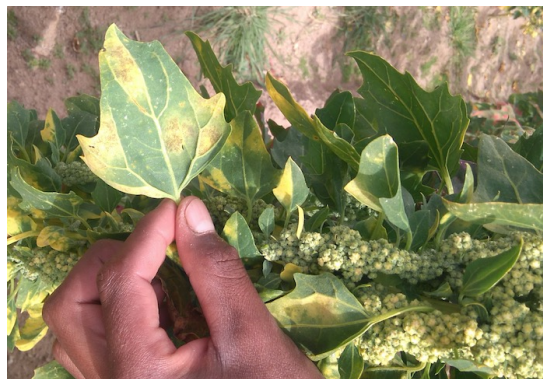

b

a) Leaves of wild-growing *Chenopodium* plants showing symptoms corresponding to the presence of complex pathogen infections.

b) An infected plant with primarily downy mildew disease.

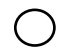

## Diseases – lesions on leaf surface

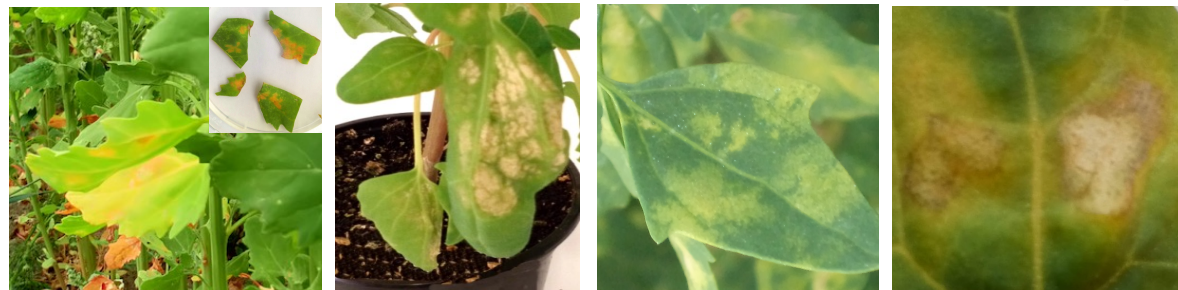

a

b

c

d

Lesions on leaf surface: a) pale or yellow chlorotic lesions with or without a halo and occasional pink-orange discoloration caused by a complex of leaf pathogens, b) bronze irregular lesions caused by *Alternaria* sp., c) diffuse chlorotic spots caused by *P. variabilis* and d) concentric and chlorotic halo under artificial inoculation with *Alternaria* sp.

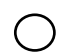

## Diseases – sporulation on abaxial leaf surface

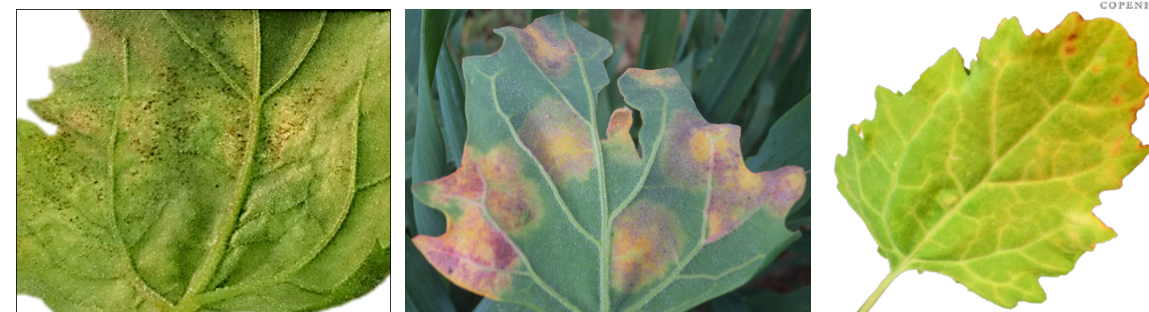

a

b

c

Black dots showing downy mildew sporangia

Dark grey-violaceous sporulation caused by downy mildew (*Peronospora variabilis*)

Vein discoloration, general chlorosis and pink-orange spots caused by *Fusarium* sp. (Colque-Little, 2020)

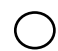

## Diseases – lesion type

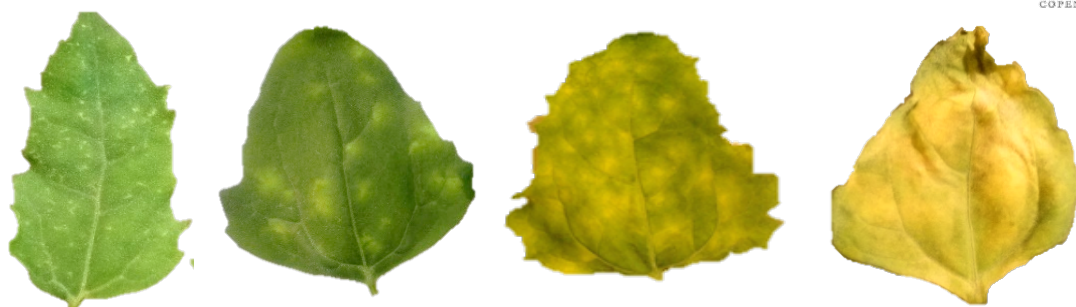

a

b

c

d

Lesion type on upper surfaces and amount of disease ranging from a) dots, b) dots expanding, c) diffuse, and d) extensive (Colque-Little et al, 2021)

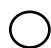

## Diseases – scoring for area covered

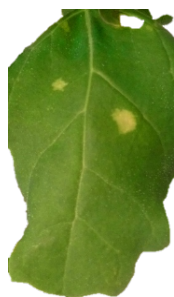

1 = 0%–10%

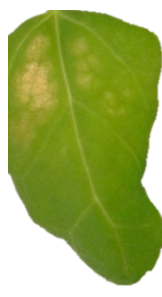

2 = 11%–25%

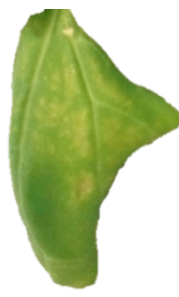

3 = 26%–50%

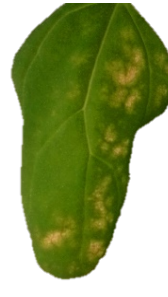

4 = 51%–70%

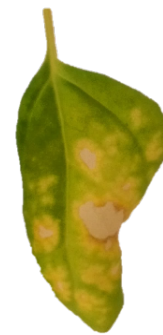

5 = 71%–100%

Severity phenotyping scale 1-5 used for assessing the percentage of the leaf area affected. Leaf examples given represent different degrees of disease severity during the infection of *Alternaria* sp. on quinoa leaves

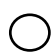

## Examples for stem diseases

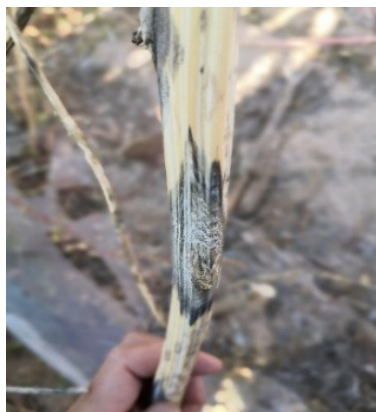

Quinoa black stem caused by *Ascochyta caulina* with the presence of dark structures (pycnidia) (Yin et al., (2020))

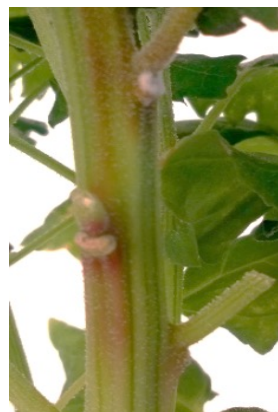

Pink stem and light pink mycelia corresponding to *Fusarium* sp. (Colque-Little et al., (2020))

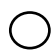

## Examples for panicle diseases

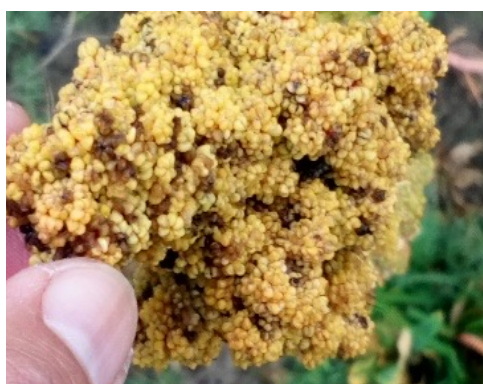

**a**

A panicle infected with *Alternaria* sp.

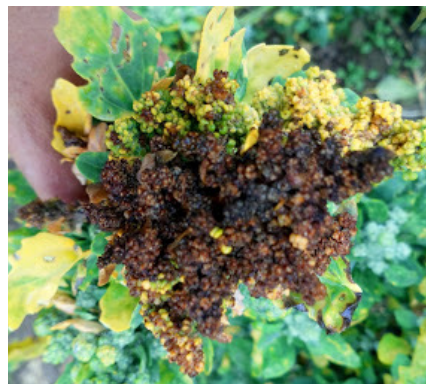

**b**

A panicle predominantly infected with *Cladosporium* sp. at the end of the season.

(Photos by Colque-Little 2020)
